# Supplementary material for: Genetic basis of nitrogen use efficiency and yield stability across environments in winter rapeseed
Source: BMC Genet. 2016 Sep 15;17:131. doi: 10.1186/s12863-016-0432-z (PMC5024496; doi:10.1186/s12863-016-0432-z)
Supplement: Additional file 6: Table S6. — Results of the GWAS for the WOSR populations for each trial × N × trait combination. (XLSX 150 kb) [file 12863_2016_432_MOESM6_ESM.xlsx]

## Sheet: AddFile6
Additional file 6: Results of the GWAS for the WOSR populations for each trial × N × trait combination
Genetic basis of nitrogen use efficiency and yield stability across environments in winter rapeseed
Bouchet et al.
WOSR-92
Trial	Trait	N	LG	Marker (1)	Position (cM) (2)	Position (bp) (3)	Allele 1 (4)	Allele 2 (4)	MAF (5)	Start (cM) (6)	End (cM) (6)	Start (bp) (7)	End (bp) (7)	R² (8)	Favorable allele (9)	Allelic effect (10)
LR09	DTF	N1	A1	Bn-A01-p912298	3	530532	C	T	0.2667	1.9	3.63	302795	689022	0.18	C	1.95956		(1)	Name of the SNP at the most significant position of the GWAS-QTL
LR09	DTF	N1	A1	Bn-A01-p1977270	9.4	1482160	T	C	0.1304	9.4	10.1	1.41816e+06	1.54616e+06	0.12	T	1.9411		(2)	Genetic position of the most significant SNP on the WOSR map (in cM)
LR09	DTF	N1	A1	Bn-A01-p2345255	14.5	1831448	C	T	0.0786	10.7	29	1.56e+06	3.96571e+06	0.23	C	3.54215		(3)	Physical position of the most significant SNP within the B. napus sequence (in bp)
LR09	DTF	N1	A2	Bn-A02-p4151292	21.9	1532662	T	C	0.0659	6.69	27.75	350319	1.81372e+06	0.14	T	3.02995		(4)	Alleles found in the population at the most significant SNP with allele 1 the most frequent form
LR09	DTF	N1	A2	Bn-A02-p20363776	74.3	19650647	C	T	0.3152	74.3	74.3	1.95075e+07	1.97938e+07	0.12	T	1.38843			and allele 2 the less frequent form
LR09	DTF	N1	A3	Bn-A03-p1755651	12.39	1354935	G	A	0.4022	10.79	13.69	1.20887e+06	1.49946e+06	0.16	G	1.63414		(5)	Minor allele frequency
LR09	DTF	N1	A3	Bn-C3-p4661123	31.19	3252208	G	A	0.25	30.79	32.79	3.18305e+06	3.4314e+06	0.14	G	1.69133		(6)	Boundaries of the GWAS-QTL on the WOSR map (in cM)
LR09	DTF	N1	A3	Bn-A03-p5612769	44.79	5046825	T	C	0.0909	40.49	45.69	4.61671e+06	5.12222e+06	0.18	T	2.78962		(7)	Boundaries of the GWAS-QTL within the B. napus sequence (in bp)
LR09	DTF	N1	A3	Bn-A03-p14736161	78.39	13913239	G	T	0.3913	77.99	93.29	1.36291e+07	1.63089e+07	0.14	G	1.5184		(8)	Phenotypic variance explained by the most significant SNP
LR09	DTF	N1	A3	Bn-A03-p29081614	136.69	27510924	C	A	0.3913	136.69	139.79	2.72635e+07	2.77092e+07	0.12	C	1.41812		(9)	Favorable allele at the most significant position of the GWAS-QTL
LR09	DTF	N1	A4	Bn-A04-p17487757	58.8	17575602	T	C	0.1648	58.3	60.8	1.74616e+07	1.76896e+07	0.16	T	2.10014		(10)	Allelic effect at the most significant position of the GWAS-QTL
LR09	DTF	N1	A5	Bn-Scaffold000403-p12697	1.23	461528	A	C	0.2391	1.23	20.43	294741	2.68245e+06	0.18	A	2.071
LR09	DTF	N1	A5	Bn-A05-p5535142	43.13	5284938	A	C	0.0543	42.13	44.63	4.97081e+06	5.60186e+06	0.15	A	3.63893
LR09	DTF	N1	A6	Bn-A06-p6706067	59.11	6098065	A	G	0.0869	57.81	59.11	5.92512e+06	6.22535e+06	0.12	A	2.2785
LR09	DTF	N1	A6	Bn-A06-p8811363	65.91	8305581	A	G	0.3956	65.31	67.51	7.82755e+06	9.56462e+06	0.12	A	1.3364
LR09	DTF	N1	A6	Bn-A06-p22796718	107.11	21823313	G	T	0.2717	102.51	107.11	2.15804e+07	2.18778e+07	0.14	G	1.4913
LR09	DTF	N1	A7	Bn-A07-p15812852	61.15	17720037	G	A	0.4286	61.15	62.05	1.76094e+07	1.78307e+07	0.11	G	1.36212
LR09	DTF	N1	A7	Bn-A07-p17440585	69.15	19332013	C	T	0.2308	62.95	69.75	1.78884e+07	1.9445e+07	0.12	C	1.56898
LR09	DTF	N1	A7	Bn-A07-p21328168	89.75	22881733	G	A	0.3956	89.45	89.75	2.27869e+07	2.29699e+07	0.14	G	1.52963
LR09	DTF	N1	A8	Bn-A08-p13526497	16.57	11288884	G	T	0.2529	11.17	20.27	1.0588e+07	1.19898e+07	0.12	G	1.67366
LR09	DTF	N1	A8	Bn-A08-p17813465	36.87	15261270	A	C	0.2174	36.87	39.74	1.51509e+07	1.53717e+07	0.12	A	1.64855
LR09	DTF	N1	A9	Bn-A09-p5054103	107.19	29651871	C	A	0.2391	107.19	112.09	2.93554e+07	3.07308e+07	0.15	C	1.927
LR09	DTF	N1	A10	Bn-A10-p9732666	16.5	11131277	C	A	0.0978	15.6	16.5	1.10024e+07	1.12602e+07	0.12	C	2.30951
LR09	DTF	N1	C1	Bn-C1-p3540424	26.19	3204753	A	G	0.1848	18.63	28.78	2.12177e+06	3.59878e+06	0.13	A	1.84744
LR09	DTF	N1	C2	Bn-C2-p13309156	46.6	10624336	G	A	0.0543	45.4	46.6	1.00765e+07	1.11537e+07	0.13	G	3.08888
LR09	DTF	N1	C2	Bn-C2-p52041044	143.16	45419002	C	A	0.4831	134	144.38	4.48993e+07	4.59387e+07	0.15	C	1.60589
LR09	DTF	N1	C3	Bn-C3-p24523624	103.16	22631295	G	T	0.4565	96.46	104.06	2.12421e+07	2.28064e+07	0.13	G	1.40834
LR09	DTF	N1	C4	Bn-C4-p5546196	28.74	4795041	C	G	0.1087	16.58	30.64	3.65545e+06	5.10264e+06	0.22	C	2.83507
LR09	DTF	N1	C6	Bn-C6-p2575808	89.68	34569614	T	A	0.3077	85.19	89.68	3.43181e+07	3.48211e+07	0.13	T	1.48353
LR09	DTF	N1	C7	Bn-C7-p46637900	91.91	43202507	G	T	0.3333	91.91	92.2	4.3097e+07	4.33081e+07	0.12	G	1.4252
LR09	DTF	N1	C8	Bn-C8-p31610172	58.8	29496475	C	A	0.2826	57.7	60	2.93469e+07	2.9646e+07	0.12	C	1.5303
LR09	DTF	N1	C8	Bn-C8-p38977504	94.3	36468121	A	G	0.4111	94.3	94.3	3.63622e+07	3.6574e+07	0.13	A	1.36891
LR09	DTF	N1	C9	Bn-C9-p43914358	70	39679168	C	T	0.2065	55.5	98.6	1.30469e+07	4.55062e+07	0.22	C	2.40143
LR09	DTF	N2	A1	Bn-A01-p1226475	2.5	824182	T	C	0.4556	2.5	5.5	763097	935481	0.1	T	1.2814
LR09	DTF	N2	A1	Bn-A01-p3100346	22.7	2804480	T	G	0.1209	6.5	29	988473	3.96571e+06	0.2	T	2.66113
LR09	DTF	N2	A2	Bn-A02-p2867545	6.69	414947	T	G	0.1413	6.69	27.75	350319	1.81372e+06	0.14	T	2.10123
LR09	DTF	N2	A2	Bn-A02-p20363776	74.3	19650647	C	T	0.3152	74.3	74.3	1.95075e+07	1.97938e+07	0.12	T	1.38204
LR09	DTF	N2	A3	Bn-A03-p1755651	12.39	1354935	G	A	0.4022	10.79	13.69	1.20887e+06	1.49946e+06	0.15	G	1.5853
LR09	DTF	N2	A3	Bn-C3-p4661123	31.19	3252208	G	A	0.25	30.79	32.79	3.18305e+06	3.4314e+06	0.16	G	1.78329
LR09	DTF	N2	A3	Bn-A03-p5612769	44.79	5046825	T	C	0.0909	40.49	45.69	4.61671e+06	5.12222e+06	0.18	T	2.71144
LR09	DTF	N2	A3	Bn-A03-p12313036	71.89	11373428	C	T	0.1413	71.89	72.49	1.12241e+07	1.1523e+07	0.1	C	1.74553
LR09	DTF	N2	A3	Bn-A03-p14735831	78.39	13912908	T	C	0.3778	73.51	93.29	1.21883e+07	1.63089e+07	0.15	T	1.57041
LR09	DTF	N2	A3	Bn-A03-p22630782	123.89	21418564	G	T	0.3152	123.89	125.29	2.13221e+07	2.15733e+07	0.1	G	1.29781
LR09	DTF	N2	A3	Bn-A03-p29081614	136.69	27510924	C	A	0.3913	136.69	139.79	2.67979e+07	2.77264e+07	0.11	C	1.32601
LR09	DTF	N2	A4	Bn-A04-p1938332	3.8	2039403	G	A	0.0666	2.55	5.2	1.18604e+06	2.78158e+06	0.13	G	2.75003
LR09	DTF	N2	A4	Bn-A04-p7914869	10.9	9237196	G	A	0.0549	8.72	10.9	9.07785e+06	9.39655e+06	0.11	G	2.72169
LR09	DTF	N2	A4	Bn-A04-p17487757	58.8	17575602	T	C	0.1648	58.3	60.8	1.74616e+07	1.76896e+07	0.17	T	2.08552
LR09	DTF	N2	A5	Bn-Scaffold000403-p12697	1.23	461528	A	C	0.2391	1.23	15.83	352060	1.82921e+06	0.13	A	1.75306
LR09	DTF	N2	A5	Bn-A05-p5535142	43.13	5284938	A	C	0.0543	15.83	44.63	2.14639e+06	5.50833e+06	0.16	A	3.69856
LR09	DTF	N2	A5	Bn-A05-p21188442	77.03	19340746	G	T	0.1304	74.53	79.82	1.92761e+07	1.94054e+07	0.1	G	1.70626
LR09	DTF	N2	A6	Bn-A06-p19333349	68.11	15358240	A	C	0.1522	49.01	69.01	4.96551e+06	1.63046e+07	0.15	A	2.19027
LR09	DTF	N2	A6	Bn-A06-p15921988	73.71	17382374	T	C	0.3626	72.81	73.71	1.72683e+07	1.74869e+07	0.1	T	1.36654
LR09	DTF	N2	A6	Bn-A06-p22796718	107.11	21823313	G	T	0.2717	105.31	107.11	2.17463e+07	2.19004e+07	0.13	G	1.39178
LR09	DTF	N2	A7	Bn-C7-p13227423	6.83	6123634	T	C	0.2	5.05	6.83	4.91389e+06	6.77339e+06	0.11	T	1.65693
LR09	DTF	N2	A7	Bn-A07-p16100507	61.15	18001326	G	A	0.1163	58.35	68.35	1.71274e+07	1.91274e+07	0.13	G	2.12878
LR09	DTF	N2	A7	Bn-A07-p17440585	69.15	19332013	C	T	0.2308	69.15	69.75	1.92423e+07	1.94679e+07	0.14	C	1.64017
LR09	DTF	N2	A7	Bn-A07-p21321699	89.75	22875002	G	T	0.3956	89.75	89.75	2.27869e+07	2.29699e+07	0.11	G	1.36417
LR09	DTF	N2	A7	Bn-A07-p21681332	90.65	23226685	G	A	0.0869	90.65	90.65	2.31318e+07	2.33216e+07	0.1	G	2.0297
LR09	DTF	N2	A8	Bn-A08-p13526497	16.57	11288884	G	T	0.2529	9.37	20.27	1.01548e+07	1.19259e+07	0.12	G	1.66548
LR09	DTF	N2	A8	Bn-A08-p17813465	36.87	15261270	A	C	0.2174	35.67	39.74	1.47477e+07	1.54031e+07	0.14	A	1.77957
LR09	DTF	N2	A9	Bn-A09-p100554	3.69	575503	T	C	0.3222	1.09	6.39	240384	910978	0.12	T	1.48349
LR09	DTF	N2	A9	Bn-A09-p2963981	19.99	2872680	T	G	0.3111	15.89	22.59	2.48306e+06	3.2623e+06	0.12	G	1.5237
LR09	DTF	N2	A9	Bn-A09-p5054103	107.19	29651871	C	A	0.2391	107.19	113.69	2.96202e+07	3.08543e+07	0.18	C	2.04515
LR09	DTF	N2	A10	Bn-C9-p38705578	8.5	8599661	G	T	0.2619	7.7	8.8	8.37577e+06	8.82355e+06	0.11	G	1.59743
LR09	DTF	N2	A10	Bn-A10-p9732666	16.5	11131277	C	A	0.0978	15.6	16.5	1.10024e+07	1.12602e+07	0.12	C	2.26018
LR09	DTF	N2	A10	Bn-A10-p16187357	56.1	15385052	C	T	0.0652	53.86	60.18	1.52612e+07	1.55089e+07	0.11	C	2.46973
LR09	DTF	N2	C1	Bn-C1-p3589748	26.19	3253405	A	G	0.4457	24.41	28.44	2.89382e+06	3.56434e+06	0.12	A	1.32953
LR09	DTF	N2	C1	Bn-C1-p19207471	66.34	18269183	G	A	0.1319	31.3	100.64	4.62339e+06	3.77527e+07	0.1	G	1.85977
LR09	DTF	N2	C2	Bn-C2-p1157842	0.36	1027941	A	G	0.0543	0.36	7.6	976418	1.07946e+06	0.1	A	2.60258
LR09	DTF	N2	C2	Bn-C2-p3968382	14.77	3529338	T	A	0.2198	14.77	17.1	3.33165e+06	3.70627e+06	0.11	T	1.45477
LR09	DTF	N2	C2	Bn-C2-p13309156	46.6	10624336	G	A	0.0543	45.4	46.6	1.00765e+07	1.11537e+07	0.14	G	3.05679
LR09	DTF	N2	C2	Bn-C2-p15437994	53.2	12315664	A	G	0.5	46.9	54.7	1.14919e+07	1.31395e+07	0.1	G	1.31548
LR09	DTF	N2	C2	Bn-C2-p48895364	114.9	43090978	T	G	0.0652	112.4	116.5	4.28018e+07	4.33802e+07	0.1	G	2.25922
LR09	DTF	N2	C2	Bn-C2-p52041044	143.16	45419002	C	A	0.4831	125.9	143.16	4.46486e+07	4.59782e+07	0.15	C	1.54586
LR09	DTF	N2	C3	Bn-C3-p22562109	92.26	20689570	T	C	0.1196	65.46	94.36	1.20856e+07	2.09768e+07	0.11	T	1.84713
LR09	DTF	N2	C3	Bn-C3-p63645270	187.16	59450576	G	A	0.4333	184.96	189.86	5.88073e+07	6.0133e+07	0.1	A	1.1725
LR09	DTF	N2	C4	Bn-C4-p654306	3.44	460151	C	A	0.1413	3.44	7.54	459903	1.24687e+06	0.13	A	1.92991
LR09	DTF	N2	C4	Bn-C4-p2784508	13.23	2239647	G	A	0.1196	13.23	13.23	2.23934e+06	2.23995e+06	0.11	A	1.84443
LR09	DTF	N2	C4	Bn-C4-p4791516	25.24	4106817	C	T	0.0761	16.58	30.64	3.60771e+06	5.10264e+06	0.21	C	3.67033
LR09	DTF	N2	C4	Bn-C4-p15465162	51.74	14156217	G	A	0.3696	47.84	79.44	8.54672e+06	3.41316e+07	0.15	G	1.63641
LR09	DTF	N2	C4	Bn-C4-p53348463	141.24	48892764	C	T	0.5	141.24	141.24	4.87969e+07	4.89887e+07	0.1	T	1.32687
LR09	DTF	N2	C5	Bn-C5-p1705838	11.7	1541895	G	A	0.3587	11.7	13.31	1.45703e+06	1.73893e+06	0.1	A	1.23861
LR09	DTF	N2	C5	Bn-C5-p12510203	56.01	11941485	G	A	0.0543	56.01	56.31	1.14652e+07	1.25181e+07	0.1	G	2.72945
LR09	DTF	N2	C6	Bn-C6-p30143466	29.78	11612453	A	G	0.0869	20.58	30.98	1.13897e+07	1.1889e+07	0.12	A	2.21254
LR09	DTF	N2	C6	Bn-C6-p20357120	40.88	18065547	A	G	0.0543	37.98	42.88	1.72872e+07	1.88271e+07	0.1	A	2.475
LR09	DTF	N2	C6	Bn-C6-p3770257	76.28	33227061	C	T	0.0879	62.38	76.28	2.55116e+07	3.32509e+07	0.15	C	2.54052
LR09	DTF	N2	C6	Bn-C6-p3770257	76.28	33227061	C	T	0.0879	75.98	89.58	3.2982e+07	3.48154e+07	0.15	C	2.54052
LR09	DTF	N2	C7	Bn-C7-p39752297	65.5	36377015	G	A	0.25	63	66.3	3.61654e+07	3.65886e+07	0.1	G	1.40793
LR09	DTF	N2	C7	Bn-C7-p46637900	91.91	43202507	G	T	0.3333	91.91	92.2	4.3097e+07	4.33081e+07	0.12	G	1.37778
LR09	DTF	N2	C8	Bn-C8-p21396843	27.1	20679961	T	C	0.0978	26.2	32.3	2.0402e+07	2.09579e+07	0.1	C	1.89272
LR09	DTF	N2	C8	Bn-C8-p30643825	56.4	28487919	A	C	0.0543	54	56.4	2.81459e+07	2.89214e+07	0.1	A	2.60751
LR09	DTF	N2	C8	Bn-C8-p31610172	58.8	29496475	C	A	0.2826	57.7	60	2.93469e+07	2.9646e+07	0.11	C	1.47984
LR09	DTF	N2	C9	Bn-C9-p43914358	70	39679168	C	T	0.2065	50.2	80.2	7.52627e+06	4.30171e+07	0.23	C	2.39051
LR09	O/Pr	N1	A5	Bn-A02-p26656981	103.23	22149643	T	G	0.2198	96.73	103.23	2.10448e+07	2.25646e+07	0.16	G	0.138293
LR09	O/Pr	N1	A6	Bn-A06-p3416803	34.01	3232821	T	C	0.1957	31.51	35.21	3.17687e+06	3.30302e+06	0.13	T	0.122858
LR09	O/Pr	N1	A6	Bn-A06-p17831661	82.81	19251131	T	C	0.4674	81.52	82.81	1.91981e+07	1.93041e+07	0.13	T	0.096762
LR09	O/Pr	N1	A6	Bn-A06-p21983885	99.21	21017662	T	C	0.3736	98.91	99.21	2.09809e+07	2.10634e+07	0.17	C	0.119015
LR09	O/Pr	N1	A6	Bn-A06-p23590868	111.81	22561197	C	T	0.1667	110.51	111.81	2.24686e+07	2.26546e+07	0.14	T	0.130368
LR09	O/Pr	N1	A9	Bn-A01-p9125819	15.89	2472865	G	T	0.4945	9.99	39.99	1.19429e+06	4.58138e+06	0.22	G	0.142339
LR09	O/Pr	N1	C2	Bn-C2-p51343986	134	44930141	A	G	0.4588	126.5	134	4.42373e+07	4.54609e+07	0.2	A	0.146128
LR09	O/Pr	N1	C7	Bn-C7-p38813167	60.24	35566300	T	C	0.413	59.91	60.25	3.53188e+07	3.58138e+07	0.13	C	0.108789
LR09	O/Pr	N1	C9	Bn-C9-p4989649	29.1	3592250	T	C	0.4186	29.1	29.1	3.39091e+06	3.79359e+06	0.15	T	0.126786
LR09	O/Pr	N2	A5	Bn-A05-p23791467	105.83	23010573	T	C	0.1758	96.73	105.83	2.10448e+07	2.3174e+07	0.17	C	0.130332
LR09	O/Pr	N2	A9	Bn-A09-p3024539	19.99	2944505	T	C	0.4659	9.99	39.99	1.19796e+06	4.62029e+06	0.22	T	0.123837
LR09	O/Pr	N2	C1	Bn-C1-p5195180	31.5	5031632	C	T	0.3516	31.5	32.7	4.85954e+06	5.2294e+06	0.13	T	0.0918723
LR09	O/Pr	N2	C2	Bn-C2-p52710286	53.2	12286932	G	A	0.3412	46.9	54.7	1.14631e+07	1.31332e+07	0.15	G	0.0970202
LR09	O/Pr	N2	C2	Bn-C2-p51343986	134	44930141	A	G	0.4588	126.5	134	4.42373e+07	4.54609e+07	0.19	A	0.120528
LR09	O/Pr	N2	C7	Bn-C7-p38813167	60.25	35566300	T	C	0.413	57.5	60.25	3.47302e+07	3.57496e+07	0.16	C	0.100875
LR09	O/Pr	N2	C8	Bn-C8-p36677731	83.9	34238594	T	C	0.1957	83.9	84.7	3.41076e+07	3.45192e+07	0.13	C	0.10738
LR09	O/Pr	N2	C9	Bn-C9-p4989649	29.1	3592250	T	C	0.4186	16.3	55.5	574146	3.8351e+06	0.19	T	0.119533
LR09	O	N1	A4	Bn-A04-p11513352	22.1	12569734	G	A	0.0562	21.8	22.5	1.24264e+07	1.27104e+07	0.14	G	1.32882
LR09	O	N1	A5	Bn-A02-p26656981	103.23	22149643	T	G	0.2198	97.53	105.83	2.10614e+07	2.3174e+07	0.22	G	1.06088
LR09	O	N1	A6	Bn-A06-p17831661	82.81	19251131	T	C	0.4674	81.52	82.81	1.91981e+07	1.93041e+07	0.14	T	0.658445
LR09	O	N1	A9	Bn-A09-p1989556	15.59	1964619	G	A	0.3864	5.69	35.49	866574	4.16336e+06	0.28	A	0.992646
LR09	O	N1	C2	Bn-C2-p51343986	134	44930141	A	G	0.4588	114.9	134	4.3227e+07	4.53858e+07	0.19	A	0.906112
LR09	O	N1	C7	Bn-C7-p37815425	57.5	34913509	C	T	0.3587	57.5	58.4	3.47684e+07	3.50587e+07	0.14	T	0.70301
LR09	O	N1	C9	Bn-C9-p4989649	29.1	3592250	T	C	0.4186	29.1	29.1	3.39091e+06	3.79359e+06	0.14	T	0.786017
LR09	O	N2	A1	Bn-A01-p23330944	70.4	19203701	T	C	0.3371	68.3	70.4	1.86894e+07	1.97499e+07	0.13	C	0.640741
LR09	O	N2	A2	Bn-A02-p10338350	55.1	7202450	G	A	0.2283	48.9	55.85	5.45553e+06	8.02461e+06	0.15	A	0.816753
LR09	O	N2	A5	Bn-A05-p23081875	100.36	21224874	G	T	0.3111	95.22	105.83	2.08638e+07	2.3174e+07	0.22	T	0.849891
LR09	O	N2	A6	Bn-A06-p3428214	35.2	3247065	T	C	0.1868	32.91	35.21	3.19111e+06	3.30302e+06	0.12	T	0.707725
LR09	O	N2	A7	Bn-A07-p21970228	90.65	23362631	C	A	0.163	90.65	93.65	2.32543e+07	2.34575e+07	0.13	A	0.784168
LR09	O	N2	A9	Bn-A09-p1931318	14.19	2024483	A	G	0.4091	9.99	39.99	1.19429e+06	4.62029e+06	0.23	G	0.822753
LR09	O	N2	A9	Bn-A09-p7047022	49.89	5815858	T	C	0.3846	47.49	53.29	5.66572e+06	6.52914e+06	0.18	C	0.685348
LR09	O	N2	C1	Bn-C1-p6453216	37.91	6231100	T	G	0.1222	24.41	37.91	2.94616e+06	6.6727e+06	0.18	G	1.01811
LR09	O	N2	C2	Bn-C2-p51343986	134	44930141	A	G	0.4588	125.9	143.16	4.44059e+07	4.54544e+07	0.17	A	0.788078
LR09	O	N2	C3	Bn-C3-p12358481	61.56	11463141	G	A	0.3043	60.96	64.06	1.10664e+07	1.16901e+07	0.12	A	0.604721
LR09	O	N2	C4	Bn-C4-p3457408	16.58	3624662	C	T	0.163	16.58	21.04	3.52577e+06	3.73913e+06	0.15	T	0.833184
LR09	O	N2	C7	Bn-C7-p37904086	57.5	34993899	A	C	0.3077	57.5	60.25	3.48377e+07	3.55845e+07	0.14	C	0.694218
LR09	O	N2	C9	Bn-C9-p2005895	16.3	872059	T	C	0.4565	16.3	55.5	574146	3.8351e+06	0.15	T	0.725554
LR09	Pr	N2	A9	Bn-A09-p3024539	19.99	2944505	T	C	0.4659	15.59	22.59	2.07749e+06	3.33988e+06	0.2	C	0.740206
LR09	Pr	N2	C2	Bn-C2-p51343986	134	44930141	A	G	0.4588	125.9	143.16	4.44059e+07	4.54544e+07	0.18	G	0.743048
LR09	SN	N2	A1	Bn-A01-p938887	3	554781	G	A	0.2174	2.2	3	496680	675759	0.16	A	10460.5
LR09	SN	N2	A2	Bn-A02-p10020231	55.1	6858707	T	C	0.1848	55.1	61.7	6.29976e+06	7.74244e+06	0.16	C	11847.5
LR09	SN	N2	A3	Bn-A03-p23043608	127.29	21830216	C	T	0.1304	126.69	127.29	2.17299e+07	2.19305e+07	0.18	T	12346.5
LR09	SN	N2	A5	Bn-A02-p23095572	100.36	21629496	T	G	0.1957	96.73	105.83	2.10448e+07	2.3174e+07	0.22	G	12695.7
LR09	SN	N2	A6	Bn-A06-p21983885	99.21	21017662	T	C	0.3736	99.21	99.21	2.0981e+07	2.10543e+07	0.14	C	8231.52
LR09	SN	N2	A9	Bn-A09-p2419287	13.69	1606147	G	A	0.2209	9.99	15.89	1.26641e+06	2.39791e+06	0.14	G	9552.85
LR09	SN	N2	C1	Bn-A01-p23642494	79.24	34893024	G	A	0.1648	76.5	79.24	3.43125e+07	3.54736e+07	0.14	G	10376.1
LR09	SN	N2	C2	Bn-C2-p47405916	104.3	41717157	G	T	0.3478	101.2	106.2	4.15062e+07	4.19281e+07	0.19	T	10299.5
LR09	SY	N2	A2	Bn-A02-p10020231	55.1	6858707	T	C	0.1848	53.9	57.21	6.25852e+06	7.52284e+06	0.14	C	4.4291
LR09	SY	N2	A5	Bn-A02-p23095572	100.36	21629496	T	G	0.1957	98.13	105.83	2.10714e+07	2.3174e+07	0.25	G	5.41953
LR09	SY	N2	A6	Bn-A06-p21983885	99.21	21017662	T	C	0.3736	98.91	99.21	2.09809e+07	2.10634e+07	0.15	C	3.30547
LR09	SY	N2	A9	Bn-A09-p3024539	19.99	2944505	T	C	0.4659	13.69	22.59	1.59124e+06	3.44228e+06	0.15	T	3.59436
LR09	SY	N2	C2	Bn-C2-p52710286	53.2	12286932	G	A	0.3412	46.9	54.7	1.14631e+07	1.31332e+07	0.13	G	3.17589
LR09	SY	N2	C2	Bn-C2-p47405916	104.3	41717157	G	T	0.3478	101.2	106.2	4.15062e+07	4.19281e+07	0.16	T	3.79054
LR09	SY	N2	C9	Bn-C9-p2304853	19.2	1145407	C	T	0.3556	16.3	19.2	545542	1.41686e+06	0.13	C	3.20137
LR10	DTF	N1	A1	Bn-A01-p912298	3	530532	C	T	0.2667	1.9	3	302884	674683	0.2	C	2.27996
LR10	DTF	N1	A1	Bn-A01-p3100346	22.7	2804480	T	G	0.1209	10.1	27.2	1.58287e+06	3.50143e+06	0.21	T	3.09577
LR10	DTF	N1	A3	Bn-A03-p1755651	12.39	1354935	G	A	0.4022	10.79	13.69	1.20956e+06	1.49946e+06	0.13	G	1.63041
LR10	DTF	N1	A3	Bn-A03-p5612769	44.79	5046825	T	C	0.0909	40.49	45.69	4.61671e+06	5.12222e+06	0.18	T	3.09498
LR10	DTF	N1	A3	Bn-C3-p19210667	73.51	12064484	G	A	0.4066	73.51	73.51	1.19274e+07	1.22016e+07	0.12	G	1.57866
LR10	DTF	N1	A3	Bn-A03-p25474850	132.89	23842932	C	T	0.0652	132.89	132.89	2.33986e+07	2.39463e+07	0.13	C	3.1142
LR10	DTF	N1	A4	Bn-A04-p17487757	58.8	17575602	T	C	0.1648	58.3	60.3	1.74677e+07	1.76835e+07	0.15	T	2.16013
LR10	DTF	N1	A5	Bn-Scaffold000403-p12697	1.23	461528	A	C	0.2391	1.226642	20.43	294741	2.66875e+06	0.15	A	2.151
LR10	DTF	N1	A6	Bn-A06-p22796718	107.11	21823313	G	T	0.2717	105.31	107.11	2.17312e+07	2.18992e+07	0.13	G	1.62588
LR10	DTF	N1	A7	Bn-A07-p16100507	61.15	18001326	G	A	0.1163	61.15	64.35	1.74816e+07	1.85211e+07	0.12	G	2.35806
LR10	DTF	N1	A8	Bn-A08-p13830207	17.37	11563063	A	G	0.3407	13.37	20.27	1.09261e+07	1.19259e+07	0.12	A	1.58698
LR10	DTF	N1	A9	Bn-A01-p2667471	19.99	2927883	A	G	0.1099	17.49	22.59	2.55341e+06	3.30235e+06	0.15	A	2.56097
LR10	DTF	N1	A9	Bn-A09-p5054103	107.19	29651871	C	A	0.2391	107.19	108.09	2.94113e+07	2.99397e+07	0.15	C	2.21131
LR10	DTF	N1	C1	Bn-C1-p2869084	20.34	2513992	C	T	0.0761	18.63	24.41	2.12177e+06	2.90621e+06	0.13	C	3.01347
LR10	DTF	N1	C1	Bn-C1-p3589748	26.19	3253405	A	G	0.4457	24.41	28.44	2.94616e+06	3.56065e+06	0.15	A	1.67266
LR10	DTF	N1	C2	Bn-C2-p52041044	143.16	45419002	C	A	0.4831	141.95	143.16	4.5181e+07	4.5657e+07	0.16	C	1.84805
LR10	DTF	N1	C3	Bn-C3-p18624006	78.16	17260172	T	G	0.3516	77.62	79.26	1.69075e+07	1.76201e+07	0.13	G	1.84732
LR10	DTF	N1	C3	Bn-C3-p22562109	92.26	20689570	T	C	0.1196	91.66	94.36	2.05095e+07	2.08696e+07	0.12	T	2.20212
LR10	DTF	N1	C3	Bn-C3-p24523624	103.16	22631295	G	T	0.4565	103.16	104.33	2.24515e+07	2.28111e+07	0.13	G	1.58185
LR10	DTF	N1	C4	Bn-C4-p4469621	21.04	3759652	T	G	0.0543	16.58	23.1	3.65545e+06	3.86386e+06	0.12	T	3.06307
LR10	DTF	N1	C4	Bn-C4-p5546196	28.74	4795041	C	G	0.1087	23.1	29.54	3.9252e+06	4.9808e+06	0.25	C	3.33492
LR10	DTF	N1	C4	Bn-C4-p25457754	61.54	22779563	T	G	0.2771	60.04	61.54	2.18124e+07	2.3705e+07	0.15	T	1.85995
LR10	DTF	N1	C6	Bn-C6-p30143466	29.78	11612453	A	G	0.0869	20.58	30.98	1.13897e+07	1.1889e+07	0.14	A	2.69633
LR10	DTF	N1	C6	Bn-C6-p3770257	76.28	33227061	C	T	0.0879	75.98	78.83	3.2982e+07	3.34793e+07	0.15	C	2.95353
LR10	DTF	N1	C6	Bn-C6-p2575808	89.68	34569614	T	A	0.3077	85.19	89.68	3.43181e+07	3.48211e+07	0.15	T	1.75749
LR10	DTF	N1	C8	Bn-C8-p38619492	91.6	36068650	C	T	0.0761	89.2	94.3	3.59594e+07	3.61779e+07	0.12	C	3.11812
LR10	DTF	N1	C8	Bn-C8-p38977504	94.3	36468121	A	G	0.4111	94.3	96.09	3.62788e+07	3.65885e+07	0.15	A	1.6172
LR10	DTF	N1	C9	Bn-C9-p20421980	59.1	14804922	T	C	0.4333	59.1	59.1	1.44106e+07	1.51522e+07	0.14	C	1.65954
LR10	DTF	N1	C9	Bn-C9-p20065981	60.54	16929677	C	T	0.4719	59.3	60.54	1.66068e+07	1.72525e+07	0.12	T	1.59809
LR10	DTF	N2	A1	Bn-A01-p912298	3	530532	C	T	0.2667	1.9	3	401032	675409	0.22	C	2.12895
LR10	DTF	N2	A1	Bn-A01-p3100346	22.7	2804480	T	G	0.1209	10.7	27.2	1.56e+06	3.50649e+06	0.21	T	2.76427
LR10	DTF	N2	A3	Bn-A03-p5612769	44.79	5046825	T	C	0.0909	40.49	46.59	4.52709e+06	5.56656e+06	0.19	T	2.82358
LR10	DTF	N2	A4	Bn-A04-p17487757	58.8	17575602	T	C	0.1648	58.3	60.3	1.74677e+07	1.76835e+07	0.15	T	1.94498
LR10	DTF	N2	A9	Bn-A09-p5054103	107.19	29651871	C	A	0.2391	107.19	108.09	2.94255e+07	2.99397e+07	0.18	C	2.12536
LR10	DTF	N2	C2	Bn-C2-p52041044	143.16	45419002	C	A	0.4831	141.95	143.16	4.5181e+07	4.5657e+07	0.15	C	1.59179
LR10	DTF	N2	C4	Bn-C4-p4469621	21.04	3759652	T	G	0.0543	16.58	23.1	3.65545e+06	3.86386e+06	0.15	T	3.05566
LR10	DTF	N2	C4	Bn-C4-p5546196	28.74	4795041	C	G	0.1087	23.1	29.54	3.9252e+06	4.97666e+06	0.23	C	2.88082
LR10	DTF	N2	C6	Bn-C6-p30143466	29.78	11612453	A	G	0.0869	20.58	30.08	1.13897e+07	1.18352e+07	0.15	A	2.56553
LR10	DTF	N2	C6	Bn-C6-p2575808	89.68	34569614	T	A	0.3077	85.19	89.68	3.43181e+07	3.48211e+07	0.15	T	1.59282
LR10	DTF	N2	C9	Bn-C9-p43914358	70	39679168	C	T	0.2065	64.9	98.6	34232373	4.55062e+07	0.18	C	2.15583
LR10	O/Pr	N1	A1	Bn-C1-p10555190	41.36	6515687	C	T	0.1957	41.36	45.2	6.42947e+06	6.60191e+06	0.1	C	0.130288
LR10	O/Pr	N1	A1	Bn-A01-p11052248	59.4	9167218	C	A	0.3258	58.21	59.7	8.93077e+06	9.40366e+06	0.1	C	0.108691
LR10	O/Pr	N1	A3	Bn-A03-p8681690	59.19	7968829	G	A	0.3678	21.29	60.39	2.37908e+06	8.0418e+06	0.17	G	0.13818
LR10	O/Pr	N1	A3	Bn-A03-p13912476	76.69	13017255	C	T	0.4396	75.59	77.99	1.27885e+07	1.3554e+07	0.12	C	0.113723
LR10	O/Pr	N1	A3	Bn-A03-p17985410	101.59	16992492	G	A	0.1848	93.29	104.19	1.67938e+07	1.723e+07	0.13	G	0.153846
LR10	O/Pr	N1	A4	Bn-A04-p716889	1	600883	C	T	0.0778	0.7	1	449987	751779	0.11	C	0.206119
LR10	O/Pr	N1	A4	Bn-A04-p11512379	22.1	12568660	T	C	0.0889	21.85	22.5	1.24217e+07	1.27104e+07	0.17	T	0.213016
LR10	O/Pr	N1	A4	Bn-A04-p13562332	40	14240093	C	A	0.1	33.5	40	1.39739e+07	1.45063e+07	0.11	C	0.175994
LR10	O/Pr	N1	A5	Bn-A05-p1254185	7.53	1370385	G	T	0.2826	5.33	9.63	1.185e+06	1.55577e+06	0.14	G	0.131656
LR10	O/Pr	N1	A5	Bn-A05-p17262653	53.13	14220462	G	A	0.0769	53.13	53.13	1.3743e+07	1.46845e+07	0.12	G	0.204553
LR10	O/Pr	N1	A5	Bn-A05-p22943215	96.73	21054060	T	G	0.337	95.73	99.83	2.09294e+07	2.13058e+07	0.12	T	0.112759
LR10	O/Pr	N1	A5	Bn-A05-p23876386	104.63	22847000	T	G	0.119	103.53	105.83	2.27107e+07	2.29589e+07	0.16	T	0.180117
LR10	O/Pr	N1	A6	Bn-A06-p3066038	25.61	2958766	A	C	0.3478	24.71	27.41	2.90573e+06	3.0118e+06	0.1	A	0.0998726
LR10	O/Pr	N1	A6	Bn-A06-p3414128	32.91	3231109	C	T	0.3587	31.51	35.21	3.17515e+06	3.30302e+06	0.15	C	0.128632
LR10	O/Pr	N1	A6	Bn-A06-p5930501	52.71	5364528	A	G	0.1538	51.31	55.31	5.26579e+06	5.50373e+06	0.11	A	0.135554
LR10	O/Pr	N1	A6	Bn-A06-p21986550	99.21	21020601	G	A	0.3804	96.51	100.11	2.05957e+07	2.13418e+07	0.13	A	0.117582
LR10	O/Pr	N1	A7	Bn-A10-p11871893	3.85	2263914	A	G	0.3187	2.35	5.05	415101	3.45107e+06	0.14	A	0.118094
LR10	O/Pr	N1	A7	Bn-A07-p15447440	60.85	17359223	A	G	0.1304	60.55	61.15	1.72531e+07	1.74653e+07	0.11	G	0.152504
LR10	O/Pr	N1	A8	Bn-A08-p11329864	6.77	9184560	T	C	0.3587	0.87	17.97	7.16286e+06	1.17299e+07	0.12	T	0.12039
LR10	O/Pr	N1	A8	Bn-A08-p16052172	29.07	13511360	T	C	0.4239	26.82	33.17	1.33277e+07	1.43974e+07	0.17	T	0.125956
LR10	O/Pr	N1	A9	Bn-A09-p3024539	19.99	2944505	T	C	0.4659	1.39	40.89	199060	4.6836e+06	0.3	T	0.193247
LR10	O/Pr	N1	A9	Bn-A09-p5244764	42.79	4917371	G	T	0.2093	40.89	44.29	4.75297e+06	5.0694e+06	0.12	T	0.127638
LR10	O/Pr	N1	A9	Bn-C9-p11083912	53.59	6379009	C	A	0.3077	53.59	53.59	6.18632e+06	6.5489e+06	0.12	A	0.120662
LR10	O/Pr	N1	A9	Bn-A09-p33415187	113.69	14737910	A	G	0.1538	106.19	113.69	1.454e+07	3.11608e+07	0.17	A	0.182304
LR10	O/Pr	N1	A9	Bn-A09-p35681738	123.09	32820006	C	T	0.0778	121.89	123.09	3.25966e+07	3.30434e+07	0.1	C	0.178939
LR10	O/Pr	N1	A10	Bn-A10-p14340467	42.9	14274879	C	A	0.1413	39.7	43.8	1.4138e+07	1.44084e+07	0.14	C	0.170159
LR10	O/Pr	N1	A10	Bn-A10-p15964373	58.5	15596430	G	A	0.1087	57.6	61.8	1.54726e+07	1.57202e+07	0.1	G	0.152845
LR10	O/Pr	N1	C1	Bn-C1-p3653207	28.44	3331955	A	G	0.3297	18.63	29.84	2.21787e+06	3.92114e+06	0.13	G	0.124745
LR10	O/Pr	N1	C2	Bn-C2-p52710286	53.2	12286932	G	A	0.3412	46.9	54.7	1.1781e+07	1.28154e+07	0.16	G	0.133405
LR10	O/Pr	N1	C2	Bn-C2-p51343986	134	44930141	A	G	0.4588	111.7	139.9	4.27218e+07	46139626	0.31	A	0.208821
LR10	O/Pr	N1	C4	Bn-C4-p39665345	82.94	35399536	G	A	0.163	80.04	83.24	3.47045e+07	3.62497e+07	0.16	G	0.159886
LR10	O/Pr	N1	C5	Bn-C5-p544831	4.01	571291	C	T	0.0652	4.01	4.01	498726	643888	0.1	C	0.191457
LR10	O/Pr	N1	C5	Bn-C5-p45854218	117.01	42566107	A	G	0.3043	117.01	118.51	4.24665e+07	4.26657e+07	0.12	A	0.114801
LR10	O/Pr	N1	C6	Bn-C6-p4160809	74.58	32795196	A	C	0.1429	74.58	74.79	3.27401e+07	3.28503e+07	0.1	A	0.139752
LR10	O/Pr	N1	C7	Bn-C7-p38813167	60.25	35566300	T	C	0.413	57.5	60.25	3.47302e+07	3.57496e+07	0.2	C	0.153865
LR10	O/Pr	N1	C7	Bn-C7-p39692847	63	36259231	C	T	0.2283	63	64.87	3.60374e+07	3.67844e+07	0.1	T	0.124572
LR10	O/Pr	N1	C7	Bn-C7-p41997955	74.7	38660576	G	A	0.1739	72.5	74.7	3.841e+07	3.89913e+07	0.11	A	0.13558
LR10	O/Pr	N1	C8	Bn-C8-p24127988	38.24	8951938	A	T	0.4565	4	39.5	7.86478e+06	2.18149e+07	0.12	T	0.110548
LR10	O/Pr	N1	C8	Bn-C8-p37330048	86.8	34813823	T	C	0.1522	85.3	86.8	3.47023e+07	3.49253e+07	0.15	T	0.168022
LR10	O/Pr	N1	C9	Bn-C9-p4989649	29.1	3592250	T	C	0.4186	16.3	55.5	574146	3.8351e+06	0.3	T	0.202059
LR10	O/Pr	N2	A1	Bn-A01-p11052248	59.4	9167218	C	A	0.3258	58.21	59.7	8.93077e+06	9.42073e+06	0.13	C	0.116909
LR10	O/Pr	N2	A2	Bn-A02-p11345557	55.85	8004800	T	C	0.163	55.85	55.85	7.88626e+06	8.12334e+06	0.1	C	0.142832
LR10	O/Pr	N2	A3	Bn-A03-p8681690	59.19	7968829	G	A	0.3678	21.29	76.69	2.3793e+06	1.3089e+07	0.17	G	0.135475
LR10	O/Pr	N2	A4	Bn-A04-p8292499	11.2	9612211	G	T	0.1149	11.2	11.5	9.47664e+06	9.74778e+06	0.09	G	0.156746
LR10	O/Pr	N2	A4	Bn-A04-p11513352	22.1	12569734	G	A	0.0562	21.85	22.5	1.24217e+07	1.27104e+07	0.11	G	0.205014
LR10	O/Pr	N2	A5	Bn-A05-p1134104	6.73	1271841	T	C	0.2273	6.73	10.23	1.0998e+06	1.44388e+06	0.1	C	0.14571
LR10	O/Pr	N2	A5	Bn-A05-p17262653	53.13	14220462	G	A	0.0769	53.13	53.13	1.3743e+07	1.46845e+07	0.1	G	0.179662
LR10	O/Pr	N2	A5	Bn-A05-p23876386	104.63	22847000	T	G	0.119	94.21	100.36	2.08441e+07	2.1776e+07	0.17	T	0.182885
LR10	O/Pr	N2	A6	Bn-A06-p1160984	6.11	1202002	G	A	0.0761	6.11	6.11	1.1207e+06	1.2585e+06	0.1	G	0.16434
LR10	O/Pr	N2	A6	Bn-A06-p3066038	25.61	2958766	A	C	0.3478	24.71	27.41	2.90573e+06	3.0118e+06	0.12	A	0.106834
LR10	O/Pr	N2	A6	Bn-A06-p3416803	34.01	3232821	T	C	0.1957	31.51	35.21	3.16666e+06	3.30302e+06	0.11	T	0.126878
LR10	O/Pr	N2	A6	Bn-A06-p5930501	52.71	5364528	A	G	0.1538	51.31	55.31	5.26579e+06	5.52932e+06	0.11	A	0.132407
LR10	O/Pr	N2	A6	Bn-A06-p21825957	97.71	20842565	A	G	0.427	97.71	99.06	2.08048e+07	2.10643e+07	0.1	G	0.10447
LR10	O/Pr	N2	A6	Bn-A06-p22806976	107.11	21833867	G	A	0.1739	105.31	107.11	2.173e+07	2.1911e+07	0.09	A	0.118782
LR10	O/Pr	N2	A6	Bn-A06-p24496051	116.66	23440008	C	T	0.4725	116.66	121.01	2.33499e+07	2.35301e+07	0.12	T	0.114969
LR10	O/Pr	N2	A7	Bn-Scaffold003472-p57	2.35	501300	G	T	0.0869	2.35	5.05	415101	3.45107e+06	0.14	G	0.191838
LR10	O/Pr	N2	A7	Bn-A07-p11330018	27.95	12682351	T	G	0.163	27.95	28.25	1.25512e+07	1.28135e+07	0.1	T	0.131352
LR10	O/Pr	N2	A7	Bn-A07-p14824091	55.55	16697242	T	C	0.1087	55.55	55.55	1.65765e+07	1.68546e+07	0.09	T	0.14596
LR10	O/Pr	N2	A7	Bn-A07-p15447440	60.85	17359223	A	G	0.1304	60.55	61.15	1.72531e+07	1.74765e+07	0.1	G	0.141718
LR10	O/Pr	N2	A8	Bn-A08-p16770669	32.87	14238091	G	A	0.4835	6.77	33.17	9.32018e+06	1.44272e+07	0.13	G	0.105827
LR10	O/Pr	N2	A9	Bn-A09-p1989556	15.59	1964619	G	A	0.3864	2.79	44.29	617833	5.09449e+06	0.33	A	0.189337
LR10	O/Pr	N2	A9	Bn-C9-p11083912	53.59	6379009	C	A	0.3077	49.89	53.59	5.76816e+06	6.52965e+06	0.12	A	0.119165
LR10	O/Pr	N2	A9	Bn-A09-p33415187	113.69	14737910	A	G	0.1538	106.89	113.69	29185629	3.11608e+07	0.12	A	0.149124
LR10	O/Pr	N2	A10	Bn-A10-p8040898	10.6	9680121	A	G	0.413	9.7	10.6	9.58293e+06	9.77731e+06	0.11	A	0.105776
LR10	O/Pr	N2	A10	Bn-A10-p14340467	42.9	14274879	C	A	0.1413	39.7	43.8	1.41345e+07	1.44157e+07	0.09	C	0.135599
LR10	O/Pr	N2	C1	Bn-C1-p3653207	28.44	3331955	A	G	0.3297	7.82	43.34	874491	9.28429e+06	0.21	G	0.153396
LR10	O/Pr	N2	C1	Bn-C1-p5195180	31.5	5031632	C	T	0.3516	31.5	37.91	4.88606e+06	6.09983e+06	0.14	T	0.121572
LR10	O/Pr	N2	C1	Bn-C1-p18212417	65.24	17137838	C	T	0.1319	65.24	66.34	1.45609e+07	1.97161e+07	0.1	C	0.138199
LR10	O/Pr	N2	C2	Bn-C2-p51343986	134	44930141	A	G	0.4588	110.5	139.9	4.258e+07	46139626	0.32	A	0.206925
LR10	O/Pr	N2	C3	Bn-C3-p13006833	65.46	12092818	G	A	0.2935	64.06	66.06	1.1871e+07	1.29423e+07	0.1	A	0.0966724
LR10	O/Pr	N2	C3	Bn-C3-p18761031	79.26	17389143	T	G	0.2857	74.66	79.26	1.51218e+07	1.77041e+07	0.12	G	0.118206
LR10	O/Pr	N2	C3	Bn-C3-p28322482	112.86	25966339	G	A	0.163	111.66	114.36	2.44874e+07	2.77352e+07	0.1	G	0.135279
LR10	O/Pr	N2	C4	Bn-C4-p6677657	33.64	5898819	T	C	0.2527	32.34	34.94	5.67068e+06	6.12696e+06	0.1	T	0.109151
LR10	O/Pr	N2	C4	Bn-C4-p39665345	82.94	35399536	G	A	0.163	80.04	83.24	3.47045e+07	3.62497e+07	0.14	G	0.14413
LR10	O/Pr	N2	C5	Bn-C5-p544831	4.01	571291	C	T	0.0652	4.01	4.01	498726	643888	0.1	C	0.183281
LR10	O/Pr	N2	C5	Bn-A05-p22159613	93.61	40046720	T	G	0.0786	93.61	94.82	3.99397e+07	4.01537e+07	0.1	T	0.172191
LR10	O/Pr	N2	C5	Bn-C5-p45854218	117.01	42566107	A	G	0.3043	117.01	118.51	4.24665e+07	4.26657e+07	0.16	A	0.128599
LR10	O/Pr	N2	C6	Bn-C6-p38801056	2.38	1610861	G	T	0.3956	2.38	2.68	1.37968e+06	2.36096e+06	0.11	G	0.103634
LR10	O/Pr	N2	C7	Bn-C7-p34172939	47.28	32075057	T	G	0.1196	42.2	50.7	3.02135e+07	3.27841e+07	0.11	T	0.16793
LR10	O/Pr	N2	C7	Bn-C7-p38813167	60.25	35566300	T	C	0.413	57.5	74.7	3.46001e+07	3.89654e+07	0.25	C	0.16773
LR10	O/Pr	N2	C8	Bn-C8-p37527969	86.8	34979190	C	G	0.3146	83.9	89.2	3.42783e+07	3.54772e+07	0.13	C	0.116751
LR10	O/Pr	N2	C9	Bn-C9-p4989649	29.1	3592250	T	C	0.4186	16.3	55.5	574146	3.8351e+06	0.31	T	0.200975
LR10	O	N1	A1	Bn-A01-p938887	3	554781	G	A	0.2174	2.2	3	496680	675759	0.12	A	0.741754
LR10	O	N1	A1	Bn-A01-p24408637	73.4	20206563	T	C	0.4828	73.4	74.6	2.01248e+07	2.02883e+07	0.1	T	0.570801
LR10	O	N1	A2	Bn-A02-p11345557	55.85	8004800	T	C	0.163	48.9	59.31	5.4813e+06	8.55062e+06	0.16	C	0.98596
LR10	O	N1	A3	Bn-A03-p708787	3.69	573276	T	C	0.2989	1.09	3.69	407594	739160	0.12	T	0.699356
LR10	O	N1	A3	Bn-A03-p25993601	130.99	24356821	T	G	0.4186	130.99	134.09	2.42588e+07	2.44549e+07	0.11	T	0.577903
LR10	O	N1	A4	Bn-A04-p11513352	22.1	12569734	G	A	0.0562	21.85	22.5	1.24217e+07	1.27104e+07	0.21	G	1.57042
LR10	O	N1	A5	Bn-A05-p1134104	6.73	1271841	T	C	0.2273	6.73	10.23	1.0998e+06	1.44388e+06	0.11	C	0.792593
LR10	O	N1	A5	Bn-A05-p17262653	53.13	14220462	G	A	0.0769	53.13	53.13	1.3743e+07	1.46845e+07	0.11	G	1.06711
LR10	O	N1	A5	Bn-A05-p22943215	96.73	21054060	T	G	0.337	95.73	100.36	2.08827e+07	2.13197e+07	0.17	T	0.741702
LR10	O	N1	A6	Bn-A06-p3416803	34.01	3232821	T	C	0.1957	31.51	34.01	3.17663e+06	3.28901e+06	0.1	T	0.683516
LR10	O	N1	A6	Bn-A06-p5930501	52.71	5364528	A	G	0.1538	51.31	53.71	5.26394e+06	5.46512e+06	0.12	A	0.78335
LR10	O	N1	A6	Bn-A06-p21986550	99.21	21020601	G	A	0.3804	98.91	100.11	2.09773e+07	2.1345e+07	0.12	A	0.614932
LR10	O	N1	A6	Bn-A06-p24496051	116.66	23440008	C	T	0.4725	116.66	121.01	2.33499e+07	2.35301e+07	0.12	T	0.621168
LR10	O	N1	A7	Bn-A07-p607926	2.35	503142	T	C	0.1957	2.35	2.35	436139	568303	0.13	T	0.769247
LR10	O	N1	A7	Bn-A07-p1197450	3.25	886797	C	T	0.0805	2.95	5.05	658062	3.45107e+06	0.16	C	1.14788
LR10	O	N1	A7	Bn-A07-p11330018	27.95	12682351	T	G	0.163	27.95	28.25	1.25512e+07	1.28135e+07	0.14	T	0.862752
LR10	O	N1	A8	Bn-A08-p16052172	29.07	13511360	T	C	0.4239	26.82	29.07	1.33212e+07	1.37015e+07	0.12	T	0.586245
LR10	O	N1	A8	Bn-A08-p17202184	34.87	14688723	G	A	0.4674	34.42	36.87	1.4545e+07	1.4833e+07	0.11	A	0.533413
LR10	O	N1	A9	Bn-A09-p1989556	15.59	1964619	G	A	0.3864	1.39	40.89	193428	4.70547e+06	0.33	A	1.04838
LR10	O	N1	A9	Bn-A09-p5219527	42.79	4891106	C	A	0.2706	40.89	44.29	4.75079e+06	5.09293e+06	0.13	A	0.681574
LR10	O	N1	A9	Bn-C9-p11083912	53.59	6379009	C	A	0.3077	47.49	53.59	5.66572e+06	6.52914e+06	0.18	A	0.8095
LR10	O	N1	A9	Bn-A09-p33271433	113.69	30962889	A	G	0.1333	106.19	113.69	30668180	3.11608e+07	0.12	A	0.872776
LR10	O	N1	A10	Bn-A10-p14340467	42.9	14274879	C	A	0.1413	11.7	43.8	1.02298e+07	1.43645e+07	0.11	C	0.828097
LR10	O	N1	A10	Bn-A10-p14914898	48.6	14852817	A	C	0.0978	46.3	50.6	1.46602e+07	1.50593e+07	0.12	A	0.948952
LR10	O	N1	C1	Bn-C1-p3653207	28.44	3331955	A	G	0.3297	24.41	28.54	2.94616e+06	3.64746e+06	0.12	G	0.642107
LR10	O	N1	C1	Bn-C1-p5195180	31.5	5031632	C	T	0.3516	31.5	35.84	4.88606e+06	6.49473e+06	0.14	T	0.695312
LR10	O	N1	C1	Bn-A01-p23642494	79.24	34893024	G	A	0.1648	77.44	79.24	3.43125e+07	3.54736e+07	0.11	G	0.754907
LR10	O	N1	C2	Bn-A07-p21875901	73.6	32644404	A	C	0.4022	73.6	74.9	3.19251e+07	3.33637e+07	0.11	A	0.566116
LR10	O	N1	C2	Bn-C2-p51343986	134	44930141	A	G	0.4588	111.7	134	4.27218e+07	4.524e+07	0.3	A	1.06246
LR10	O	N1	C3	Bn-C3-p18794014	79.26	17415877	T	G	0.2857	78.16	79.26	1.71046e+07	1.77014e+07	0.11	G	0.627004
LR10	O	N1	C3	Bn-C3-p28322482	112.86	25966339	G	A	0.163	111.66	115.86	2.46499e+07	2.98944e+07	0.14	G	0.884647
LR10	O	N1	C3	Bn-C3-p58485490	163.86	54645356	C	T	0.163	131.46	169.46	5.21492e+07	5.719e+07	0.11	T	0.700032
LR10	O	N1	C4	Bn-C4-p6677657	33.64	5898819	T	C	0.2527	32.34	34.94	5.67068e+06	6.12696e+06	0.12	T	0.669509
LR10	O	N1	C4	Bn-C4-p39622062	83.24	35474359	T	G	0.1413	78.14	87.84	3.3895e+07	3.79562e+07	0.21	T	1.04666
LR10	O	N1	C4	Bn-C4-p51315477	122.56	46453667	G	T	0.2198	119.94	124.04	4.6279e+07	4.66283e+07	0.13	G	0.703136
LR10	O	N1	C5	Bn-C5-p45854218	117.01	42566107	A	G	0.3043	117.01	118.51	4.24665e+07	4.26657e+07	0.14	A	0.68468
LR10	O	N1	C6	Bn-C6-p4160809	74.58	32795196	A	C	0.1429	71.68	77.26	3.2405e+07	3.31417e+07	0.12	A	0.831263
LR10	O	N1	C7	Bn-C7-p38504198	60.8	35328335	T	G	0.2826	45.8	66.3	3.1687e+07	3.66689e+07	0.2	T	0.895719
LR10	O	N1	C9	Bn-C9-p4989649	29.1	3592250	T	C	0.4186	16.3	55.5	574146	3.8351e+06	0.27	T	1.01235
LR10	O	N2	A1	Bn-A01-p1000115	3	617658	A	T	0.2247	2.2	3	496680	675759	0.13	T	0.797239
LR10	O	N2	A1	Bn-A01-p11052248	59.4	9167218	C	A	0.3258	58.21	59.7	8.93077e+06	9.42073e+06	0.12	C	0.688441
LR10	O	N2	A1	Bn-A01-p23330944	70.4	19203701	T	C	0.3371	70.1	70.4	1.90578e+07	1.93496e+07	0.1	C	0.640459
LR10	O	N2	A2	Bn-A02-p11345557	55.85	8004800	T	C	0.163	53.2	59.31	6.02104e+06	8.55404e+06	0.17	C	1.09607
LR10	O	N2	A3	Bn-A03-p708787	3.69	573276	T	C	0.2989	1.09	5.79	406743	799801	0.13	T	0.808171
LR10	O	N2	A3	Bn-A03-p8681690	59.19	7968829	G	A	0.3678	58.59	60.39	7.89906e+06	8.0386e+06	0.1	G	0.606521
LR10	O	N2	A4	Bn-A04-p11513352	22.1	12569734	G	A	0.0562	21.85	22.5	1.24217e+07	1.27104e+07	0.15	G	1.40361
LR10	O	N2	A5	Bn-A05-p1134104	6.73	1271841	T	C	0.2273	6.73	10.23	1.0998e+06	1.44388e+06	0.12	C	0.904318
LR10	O	N2	A5	Bn-A05-p23081875	100.36	21224874	G	T	0.3111	95.22	100.36	2.08638e+07	2.13197e+07	0.22	T	0.954117
LR10	O	N2	A6	Bn-A06-p1160984	6.11	1202002	G	A	0.0761	4.61	9.56	1.10027e+06	1.27104e+06	0.14	G	1.2236
LR10	O	N2	A6	Bn-A06-p3066038	25.61	2958766	A	C	0.3478	24.71	27.41	2.90573e+06	3.0118e+06	0.11	A	0.604528
LR10	O	N2	A6	Bn-A06-p5930501	52.71	5364528	A	G	0.1538	50.21	53.71	5.09882e+06	5.46512e+06	0.11	A	0.808406
LR10	O	N2	A6	Bn-A06-p24496051	116.66	23440008	C	T	0.4725	116.66	121.01	2.33499e+07	2.35301e+07	0.14	T	0.737645
LR10	O	N2	A7	Bn-Scaffold003472-p57	2.35	501300	G	T	0.0869	2.35	2.35	432212	652416	0.12	G	1.09404
LR10	O	N2	A7	Bn-A07-p1197450	3.25	886797	C	T	0.0805	2.35	5.05	658062	3.45107e+06	0.13	C	1.11151
LR10	O	N2	A7	Bn-A07-p11330018	27.95	12682351	T	G	0.163	27.95	28.25	1.25512e+07	1.28135e+07	0.16	T	0.992449
LR10	O	N2	A7	Bn-A07-p14824091	55.55	16697242	T	C	0.1087	55.55	55.55	1.65765e+07	1.68546e+07	0.11	T	0.959322
LR10	O	N2	A7	Bn-A07-p21961987	90.65	23349203	T	C	0.1413	90.65	94.75	2.32543e+07	2.34441e+07	0.1	C	0.796287
LR10	O	N2	A8	Bn-A08-p14759185	21.17	12320940	C	T	0.25	17.97	21.17	1.1719e+07	1.24537e+07	0.15	C	0.825729
LR10	O	N2	A9	Bn-A09-p1989556	15.59	1964619	G	A	0.3864	1.39	42.79	193428	5.0159e+06	0.39	A	1.22838
LR10	O	N2	A10	Bn-A10-p14914898	48.6	14852817	A	C	0.0978	46.3	50.6	1.46602e+07	1.50593e+07	0.1	A	0.926512
LR10	O	N2	C1	Bn-C1-p3653207	28.44	3331955	A	G	0.3297	7.82	29.84	879381	3.80721e+06	0.18	G	0.834859
LR10	O	N2	C1	Bn-C1-p5217213	31.5	5057305	C	T	0.3596	31.5	35.84	4.88606e+06	6.49473e+06	0.19	T	0.863833
LR10	O	N2	C1	Bn-C1-p9486981	43.34	8876178	T	G	0.2174	42.94	47.25	8.17022e+06	9.67761e+06	0.11	G	0.801172
LR10	O	N2	C1	Bn-C1-p38005397	77.44	35693203	G	A	0.3846	77.44	84.94	3.43125e+07	3.63152e+07	0.12	A	0.62168
LR10	O	N2	C2	Bn-A02-p11170230	58	15015633	A	C	0.0543	58	73.6	1.44743e+07	3.32942e+07	0.11	C	1.34858
LR10	O	N2	C2	Bn-C2-p51343986	134	44930141	A	G	0.4588	111.7	139.9	4.27218e+07	46139626	0.31	A	1.18235
LR10	O	N2	C3	Bn-C3-p13006833	65.46	12092818	G	A	0.2935	64.06	66.06	1.18502e+07	1.23513e+07	0.12	A	0.659553
LR10	O	N2	C3	Bn-C3-p18794014	79.26	17415877	T	G	0.2857	74.66	79.26	1.51635e+07	1.77788e+07	0.14	G	0.780416
LR10	O	N2	C3	Bn-C3-p24354456	103.16	22435172	C	A	0.0543	102.86	104.33	2.22554e+07	2.26205e+07	0.1	C	1.18633
LR10	O	N2	C3	Bn-C3-p28547949	113.76	26253293	G	A	0.163	111.66	114.36	2.44874e+07	2.7845e+07	0.16	G	0.992449
LR10	O	N2	C3	Bn-C3-p30529798	115.26	28566199	T	C	0.0543	114.66	131.46	2.81164e+07	4.7366e+07	0.13	T	1.39717
LR10	O	N2	C4	Bn-C4-p6677657	33.64	5898819	T	C	0.2527	32.34	34.94	5.67068e+06	6.12696e+06	0.15	T	0.801291
LR10	O	N2	C4	Bn-C4-p39622062	83.24	35474359	T	G	0.1413	80.04	83.24	3.47045e+07	3.62497e+07	0.18	T	1.01946
LR10	O	N2	C4	Bn-C4-p51315477	122.56	46453667	G	T	0.2198	119.94	124.04	4.6279e+07	4.66283e+07	0.1	G	0.676175
LR10	O	N2	C5	Bn-A06-p1082496	93.36	40098926	G	A	0.0978	93.36	94.82	3.99397e+07	4.01968e+07	0.12	G	1.01604
LR10	O	N2	C5	Bn-C5-p45854218	117.01	42566107	A	G	0.3043	117.01	118.51	4.24665e+07	4.26657e+07	0.18	A	0.831083
LR10	O	N2	C7	Bn-C7-p38504198	60.8	35328335	T	G	0.2826	49.1	60.8	3.25026e+07	3.58252e+07	0.23	T	1.0261
LR10	O	N2	C7	Bn-C7-p39692847	63	36259231	C	T	0.2283	63	68.62	3.60377e+07	3.69996e+07	0.12	T	0.789603
LR10	O	N2	C7	Bn-C7-p44174250	80.22	40827156	T	C	0.25	79.58	80.9	4.06492e+07	4.09789e+07	0.12	C	0.714972
LR10	O	N2	C8	Bn-C8-p37527969	86.8	34979190	C	G	0.3146	86.8	88	3.48706e+07	3.50878e+07	0.14	C	0.740098
LR10	O	N2	C9	Bn-C9-p4989649	29.1	3592250	T	C	0.4186	16.3	55.5	574146	3.8351e+06	0.29	T	1.14209
LR10	O	N2	C9	Bn-C9-p6285792	38.41	4628466	A	G	0.2527	33.1	66.7	4.25047e+06	7.61479e+06	0.13	G	0.815694
LR10	Pr	N1	A1	Bn-A01-p5805154	36.4	5284369	A	G	0.2556	36.4	37	5.2052e+06	5.36354e+06	0.1	G	0.615238
LR10	Pr	N1	A1	Bn-C1-p10555190	41.36	6515687	C	T	0.1957	41.36	45.2	6.42947e+06	6.60191e+06	0.1	T	0.656511
LR10	Pr	N1	A1	Bn-A01-p9853365	56.6	8480102	C	A	0.1868	55.7	59.7	8.26962e+06	9.3777e+06	0.11	A	0.737818
LR10	Pr	N1	A3	Bn-A03-p8681690	59.19	7968829	G	A	0.3678	21.29	77.59	2.38132e+06	1.35266e+07	0.2	A	0.772297
LR10	Pr	N1	A3	Bn-A03-p17985410	101.59	16992492	G	A	0.1848	93.29	104.19	1.67938e+07	1.723e+07	0.15	A	0.871358
LR10	Pr	N1	A4	Bn-A04-p716889	1	600883	C	T	0.0778	0.7	11.8	0	1.03328e+07	0.15	T	1.24214
LR10	Pr	N1	A4	Bn-A04-p11512379	22.1	12568660	T	C	0.0889	14.5	22.5	1.04884e+07	1.27193e+07	0.19	C	1.16628
LR10	Pr	N1	A4	Bn-A04-p15530059	50.3	15952178	G	T	0.3478	34.3	52.8	1.40413e+07	1.60929e+07	0.09	T	0.526432
LR10	Pr	N1	A5	Bn-A05-p1254185	7.53	1370385	G	T	0.2826	5.73	51.73	1.02345e+06	9.93843e+06	0.15	T	0.705919
LR10	Pr	N1	A5	Bn-A05-p17262653	53.13	14220462	G	A	0.0769	52.13	53.13	1.38469e+07	1.55182e+07	0.15	A	1.18411
LR10	Pr	N1	A5	Bn-A05-p23019620	97.47	21180496	C	T	0.5	96.73	100.36	2.10448e+07	2.13169e+07	0.1	T	0.544977
LR10	Pr	N1	A5	Bn-A05-p23876386	104.63	22847000	T	G	0.119	103.53	105.83	2.27107e+07	2.29589e+07	0.13	G	0.844564
LR10	Pr	N1	A6	Bn-A06-p3414128	32.91	3231109	C	T	0.3587	28.01	35.21	3.08752e+06	3.30287e+06	0.17	T	0.704618
LR10	Pr	N1	A6	Bn-C5-p6425990	48.41	4884677	T	G	0.4348	48.11	48.41	4.77309e+06	4.99626e+06	0.09	G	0.456069
LR10	Pr	N1	A6	Bn-A06-p5930501	52.71	5364528	A	G	0.1538	51.31	55.31	5.26579e+06	5.53972e+06	0.11	G	0.715201
LR10	Pr	N1	A6	Bn-A06-p21986550	99.21	21020601	G	A	0.3804	97.71	100.11	2.08041e+07	2.13431e+07	0.14	G	0.646742
LR10	Pr	N1	A7	Bn-Scaffold000232-p51903	2.95	838335	A	G	0.0549	2.35	5.05	415101	3.45107e+06	0.15	G	1.24498
LR10	Pr	N1	A7	Bn-A07-p15273529	59.95	17189065	T	C	0.1364	58.45	60.55	1.70818e+07	1.72963e+07	0.09	T	0.703027
LR10	Pr	N1	A8	Bn-A08-p11667191	8.17	9509290	G	T	0.2826	0.87	17.97	7.02315e+06	1.18425e+07	0.13	T	0.695165
LR10	Pr	N1	A8	Bn-A08-p14799839	21.17	12362293	G	A	0.1111	21.17	21.17	1.21027e+07	1.24841e+07	0.11	A	0.802421
LR10	Pr	N1	A8	Bn-A08-p16052172	29.07	13511360	T	C	0.4239	27.57	33.17	1.32986e+07	1.4403e+07	0.19	C	0.696573
LR10	Pr	N1	A9	Bn-A09-p4291965	28.39	3769203	C	T	0.3778	6.39	44.29	993106	5.05697e+06	0.27	T	0.879937
LR10	Pr	N1	A9	Bn-C9-p11083912	53.59	6379009	C	A	0.3077	53.59	53.59	6.18632e+06	6.5489e+06	0.1	C	0.561329
LR10	Pr	N1	A9	Bn-C9-p17245639	60.69	9643840	A	G	0.07609	60.39	60.69	8.97771e+06	9.89427e+06	0.11	G	1.05561
LR10	Pr	N1	A9	Bn-A09-p33415187	113.69	14737910	A	G	0.1538	106.19	121.89	1.454e+07	3.25787e+07	0.2	G	1.03891
LR10	Pr	N1	A9	Bn-A09-p35681738	123.09	32820006	C	T	0.0778	121.89	126.69	3.25966e+07	3.37202e+07	0.12	T	1.02564
LR10	Pr	N1	A10	Bn-A10-p4355593	0	475598	T	C	0.0761	0	0.4	370217	580387	0.11	C	1.0118
LR10	Pr	N1	A10	Bn-A10-p7669574	8.79	1442933	A	G	0.3043	2.3	17.6	1.15404e+06	1.14954e+07	0.11	G	0.641374
LR10	Pr	N1	A10	Bn-A10-p14340467	42.9	14274879	C	A	0.1413	39.3	62.7	1.40985e+07	1.5811e+07	0.18	A	1.01691
LR10	Pr	N1	C1	Bn-C1-p1759646	11.14	1423451	T	C	0.1978	8.44	13.04	1.11434e+06	1.73256e+06	0.09	T	0.609101
LR10	Pr	N1	C1	Bn-A01-p2775635	28.44	3367405	G	A	0.3297	24.64	30.57	3.06018e+06	4.24407e+06	0.11	G	0.577586
LR10	Pr	N1	C1	Bn-C1-p5741938	33.43	5577770	A	G	0.0543	33.43	35.56	5.33759e+06	5.84633e+06	0.1	G	1.15035
LR10	Pr	N1	C2	Bn-C2-p52710286	53.2	12286932	G	A	0.3412	33.8	54.7	5.91689e+06	1.32175e+07	0.16	A	0.695448
LR10	Pr	N1	C2	Bn-C2-p51343986	134	44930141	A	G	0.4588	111.7	134	4.27218e+07	4.53139e+07	0.28	G	1.03742
LR10	Pr	N1	C3	Bn-C3-p31101837	115.86	29908298	C	T	0.0652	115.56	119.56	2.9086e+07	3.07301e+07	0.1	T	1.00012
LR10	Pr	N1	C4	Bn-C4-p6677657	33.64	5898819	T	C	0.2527	32.34	34.94	5.67068e+06	6.12696e+06	0.09	C	0.572121
LR10	Pr	N1	C4	Bn-C2-p43595268	83.24	35343933	T	C	0.1848	80.04	83.24	3.47045e+07	3.62497e+07	0.16	C	0.792683
LR10	Pr	N1	C5	Bn-C5-p50441	2.31	168029	G	A	0.1848	2.31	2.31	77531	233349	0.1	A	0.654578
LR10	Pr	N1	C5	Bn-C5-p544831	4.01	571291	C	T	0.0652	4.01	20.11	483103	2.51772e+06	0.14	T	1.1834
LR10	Pr	N1	C5	Bn-C5-p45854218	117.01	42566107	A	G	0.3043	117.01	118.51	4.24665e+07	4.26657e+07	0.1	G	0.555226
LR10	Pr	N1	C7	Bn-C7-p38813167	60.25	35566300	T	C	0.413	47.28	60.25	3.19699e+07	3.57496e+07	0.18	T	0.77175
LR10	Pr	N1	C7	Bn-C7-p41997955	74.7	38660576	G	A	0.1739	72.5	74.7	3.841e+07	3.89913e+07	0.1	G	0.688437
LR10	Pr	N1	C8	Bn-C8-p24127988	4	8951938	A	T	0.4565	4	31.8	7.86478e+06	2.18149e+07	0.1	A	0.521969
LR10	Pr	N1	C8	Bn-C8-p37330048	86.8	34813823	T	C	0.1522	41.2	86.8	2.50105e+07	3.49578e+07	0.17	C	0.942542
LR10	Pr	N1	C8	Bn-C8-p37685683	88	35090889	C	A	0.4022	86.8	88.21	3.49811e+07	3.52007e+07	0.1	A	0.531216
LR10	Pr	N1	C9	Bn-C9-p4989649	29.1	3592250	T	C	0.4186	16.3	55.5	574146	3.8351e+06	0.26	C	0.998683
LR10	Pr	N1	C9	Bn-C9-p48028842	85.7	43503937	T	C	0.0543	82.95	87.1	4.3275e+07	4.3733e+07	0.1	C	1.23804
LR10	Pr	N2	A1	Bn-A01-p5805154	36.4	5284369	A	G	0.2556	36.4	37	5.2052e+06	5.36354e+06	0.09	G	0.580416
LR10	Pr	N2	A1	Bn-A01-p11052248	59.4	9167218	C	A	0.3258	58.21	59.7	8.93077e+06	9.42073e+06	0.11	A	0.584903
LR10	Pr	N2	A3	Bn-A03-p8681690	59.19	7968829	G	A	0.3678	21.29	77.59	2.38132e+06	1.35266e+07	0.21	A	0.783534
LR10	Pr	N2	A3	Bn-A03-p18025753	101.89	17031267	A	C	0.2111	93.29	104.19	1.68297e+07	1.72274e+07	0.09	C	0.611739
LR10	Pr	N2	A4	Bn-A04-p716889	1	600883	C	T	0.0778	0.7	11.8	0	1.03328e+07	0.1	T	1.0173
LR10	Pr	N2	A4	Bn-A04-p9505012	14.5	10638053	C	A	0.3187	14.5	15.41	1.05151e+07	1.0761e+07	0.1	A	0.562761
LR10	Pr	N2	A4	Bn-A04-p11512379	22.1	12568660	T	C	0.0889	15.41	40	1.08262e+07	1.46845e+07	0.12	C	0.93772
LR10	Pr	N2	A5	Bn-A05-p23876386	104.63	22847000	T	G	0.119	95.73	105.83	2.0929e+07	2.29589e+07	0.17	G	0.948481
LR10	Pr	N2	A6	Bn-A06-p3066038	25.61	2958766	A	C	0.3478	24.71	27.41	2.90573e+06	3.0118e+06	0.11	C	0.548526
LR10	Pr	N2	A6	Bn-A06-p3416803	34.01	3232821	T	C	0.1957	31.51	35.21	3.17515e+06	3.30302e+06	0.12	C	0.701688
LR10	Pr	N2	A6	Bn-A06-p5930501	52.71	5364528	A	G	0.1538	51.31	55.31	5.26579e+06	5.53972e+06	0.11	G	0.705436
LR10	Pr	N2	A6	Bn-A06-p21986550	99.21	21020601	G	A	0.3804	85.61	99.21	1.9609e+07	2.10644e+07	0.11	G	0.558779
LR10	Pr	N2	A6	Bn-A06-p22806976	107.11	21833867	G	A	0.1739	105.31	107.11	2.173e+07	2.1911e+07	0.1	G	0.659978
LR10	Pr	N2	A6	Bn-A06-p24496051	116.66	23440008	C	T	0.4725	116.66	121.01	2.33499e+07	2.35301e+07	0.09	C	0.544704
LR10	Pr	N2	A7	Bn-Scaffold003472-p57	2.35	501300	G	T	0.0869	2.35	5.05	415101	3.45107e+06	0.16	T	1.08705
LR10	Pr	N2	A7	Bn-A07-p14824091	55.55	16697242	T	C	0.1087	55.55	55.55	1.65765e+07	1.68546e+07	0.1	C	0.794652
LR10	Pr	N2	A7	Bn-A07-p15459314	60.85	17370368	G	T	0.0978	60.55	61.15	1.72531e+07	1.74765e+07	0.09	G	0.865608
LR10	Pr	N2	A8	Bn-A08-p11667191	8.17	9509290	G	T	0.2826	3.57	14.27	4.1693e+06	1.09615e+07	0.11	T	0.636592
LR10	Pr	N2	A8	Bn-A08-p14759185	21.17	12320940	C	T	0.25	21.17	21.17	1.21996e+07	1.24139e+07	0.1	T	0.595693
LR10	Pr	N2	A8	Bn-A08-p16052172	29.07	13511360	T	C	0.4239	25.97	33.17	1.31234e+07	1.43974e+07	0.15	C	0.615883
LR10	Pr	N2	A9	Bn-A09-p3024539	19.99	2944505	T	C	0.4659	6.39	39.99	938099	4.64714e+06	0.27	C	0.96513
LR10	Pr	N2	A9	Bn-A09-p5244764	42.79	4917371	G	T	0.2093	40.89	44.29	4.75297e+06	5.0694e+06	0.11	G	0.631307
LR10	Pr	N2	A9	Bn-A09-p33415187	113.69	14737910	A	G	0.1538	106.19	113.69	1.454e+07	3.11608e+07	0.15	G	0.903281
LR10	Pr	N2	A9	Bn-A09-p35299111	120.79	32431338	T	C	0.1648	119.99	123.09	3.22074e+07	3.30439e+07	0.1	C	0.702468
LR10	Pr	N2	A9	Bn-A09-p36491715	126.29	33496869	C	T	0.1209	126.29	126.69	3.32668e+07	3.37269e+07	0.09	T	0.715747
LR10	Pr	N2	A10	Bn-A10-p8040898	10.6	9680121	A	G	0.413	9.7	10.6	9.58293e+06	9.77731e+06	0.13	G	0.616472
LR10	Pr	N2	A10	Bn-A10-p14340467	42.9	14274879	C	A	0.1413	39.3	62.7	1.40985e+07	1.5811e+07	0.12	A	0.831445
LR10	Pr	N2	C1	Bn-C1-p3653207	28.44	3331955	A	G	0.3297	7.82	33.43	874491	5.30482e+06	0.18	A	0.755157
LR10	Pr	N2	C1	Bn-C1-p5762693	33.43	5610497	C	T	0.2391	33.43	37.91	5.35666e+06	6.02675e+06	0.1	T	0.577635
LR10	Pr	N2	C1	Bn-C1-p9486981	43.34	8876178	T	G	0.2174	42.94	45.3	8.18881e+06	9.57272e+06	0.1	T	0.692271
LR10	Pr	N2	C1	Bn-C1-p18212417	65.24	17137838	C	T	0.1319	60.47	66.34	1.44239e+07	2.00638e+07	0.11	T	0.761108
LR10	Pr	N2	C2	Bn-C2-p51343986	134	44930141	A	G	0.4588	110.5	144.38	4.258e+07	4.57164e+07	0.29	G	1.06178
LR10	Pr	N2	C4	Bn-C4-p6677657	33.64	5898819	T	C	0.2527	32.34	34.94	5.67068e+06	6.12696e+06	0.09	C	0.542389
LR10	Pr	N2	C4	Bn-C2-p43595268	83.24	35343933	T	C	0.1848	80.04	83.24	3.48714e+07	3.62623e+07	0.13	C	0.71709
LR10	Pr	N2	C5	Bn-C5-p544831	4.01	571291	C	T	0.0652	4.01	20.11	488307	2.51772e+06	0.13	T	1.12261
LR10	Pr	N2	C5	Bn-C5-p28607594	56.01	26514088	G	T	0.2967	56.01	56.01	2.57819e+07	2.72463e+07	0.09	T	0.569167
LR10	Pr	N2	C5	Bn-A05-p22159613	93.61	40046720	T	G	0.0786	93.61	94.82	3.99397e+07	4.01537e+07	0.09	G	0.88225
LR10	Pr	N2	C5	Bn-C5-p45854218	117.01	42566107	A	G	0.3043	117.01	118.51	4.24665e+07	4.26657e+07	0.13	G	0.624938
LR10	Pr	N2	C6	Bn-C6-p38790210	2.38	1625404	T	G	0.3956	2.38	2.68	1.37968e+06	1.85658e+06	0.09	G	0.513225
LR10	Pr	N2	C6	Bn-C6-p2065308	92.18	35069596	A	C	0.2609	87.48	94.98	3.46972e+07	3.5442e+07	0.1	C	0.567534
LR10	Pr	N2	C7	Bn-C7-p30277405	36	27902164	A	G	0.337	34.88	37	2.76787e+07	2.81477e+07	0.09	G	0.518262
LR10	Pr	N2	C7	Bn-C7-p38813167	60.25	35566300	T	C	0.413	42.2	74.7	3.02502e+07	3.89654e+07	0.22	T	0.848315
LR10	Pr	N2	C8	Bn-C8-p37330048	86.8	34813823	T	C	0.1522	83.9	89.2	3.42783e+07	3.54772e+07	0.13	C	0.833738
LR10	Pr	N2	C9	Bn-C9-p4989649	29.1	3592250	T	C	0.4186	16.3	55.5	574146	3.8351e+06	0.28	C	1.0264
LR10	Pr	N2	C9	Bn-C9-p48028842	85.7	43503937	T	C	0.0543	82.95	87.1	4.3275e+07	4.3733e+07	0.09	C	1.16813
LR10	SY	N1	A1	Bn-A01-p20990218	65.3	17795523	C	T	0.2022	65	65.3	1.76815e+07	1.79096e+07	0.12	C	0.244592
LR10	SY	N1	A3	Bn-A03-p8681690	59.19	7968829	G	A	0.3678	58.59	60.39	7.89906e+06	8.0386e+06	0.11	G	0.197883
LR10	SY	N1	A3	Bn-A03-p11544253	69.19	10669877	A	G	0.2283	68.89	69.79	1.05404e+07	1.07994e+07	0.11	A	0.223878
LR10	SY	N1	A4	Bn-A04-p11510797	22.1	12567132	A	G	0.0869	21.8	22.5	1.24264e+07	1.27094e+07	0.11	A	0.316989
LR10	SY	N1	A5	Bn-A05-p3966848	32.13	3834152	C	T	0.0761	28.13	32.13	3.61356e+06	4.05475e+06	0.12	C	0.354481
LR10	SY	N1	A5	Bn-A05-p22899595	96.73	21015538	G	A	0.4783	95.73	97.47	2.08904e+07	2.11406e+07	0.12	A	0.218395
LR10	SY	N1	A6	Bn-A06-p5930501	52.71	5364528	A	G	0.1538	51.31	53.71	5.26394e+06	5.46512e+06	0.11	A	0.260355
LR10	SY	N1	A6	Bn-A06-p24496051	116.66	23440008	C	T	0.4725	116.66	121.01	2.33499e+07	2.35301e+07	0.11	T	0.207808
LR10	SY	N1	A8	Bn-A08-p11667191	8.17	9509290	G	T	0.2826	6.77	8.2	9.19292e+06	9.82566e+06	0.12	G	0.23233
LR10	SY	N1	A9	Bn-A09-p3064935	20.29	2999088	C	T	0.4302	8.36	35.49	1.0331e+06	4.15882e+06	0.16	C	0.269638
LR10	SY	N1	C2	Bn-C2-p48922806	114.9	43105648	G	A	0.2935	110.5	132.2	4.258e+07	4.53139e+07	0.16	A	0.231798
LR10	SY	N1	C3	Bn-A03-p11792328	74.96	15562612	T	C	0.163	74.96	75.56	1.52761e+07	1.58491e+07	0.11	T	0.256296
LR10	SY	N1	C3	Bn-C3-p21524887	85.76	19720008	C	A	0.4457	84.46	89.46	1.94533e+07	1.99923e+07	0.11	C	0.184797
LR10	SY	N1	C4	Bn-C4-p4486064	21.04	3775760	T	G	0.4348	21.04	21.04	3.7668e+06	3.78472e+06	0.11	G	0.190772
LR10	SY	N1	C5	Bn-C5-p45854218	117.01	42566107	A	G	0.3043	117.01	118.51	4.24665e+07	4.26657e+07	0.12	A	0.202654
LR10	SY	N1	C6	Bn-C6-p4139088	74.58	32819428	T	G	0.1522	71.68	77.26	3.2405e+07	3.31417e+07	0.13	T	0.271721
LR10	SY	N1	C9	Bn-C9-p4989649	29.1	3592250	T	C	0.4186	16.3	55.5	574146	3.8351e+06	0.16	T	0.271008
LR10	SY	N1	C9	Bn-C9-p20671907	59.9	17278051	T	G	0.4891	59.9	60.54	1.69425e+07	1.7681e+07	0.11	G	0.184558
LR10	SY	N2	A1	Bn-A01-p5990203	37.6	5473093	G	A	0.2198	37	38.7	5.39465e+06	5.55153e+06	0.09	G	0.217228
LR10	SY	N2	A1	Bn-A01-p20990218	65.3	17795523	C	T	0.2022	65	65.3	1.76049e+07	1.79849e+07	0.11	C	0.257684
LR10	SY	N2	A2	Bn-A02-p10176579	55.1	7019132	G	A	0.2283	55.1	55.85	6.31105e+06	7.58077e+06	0.1	A	0.241145
LR10	SY	N2	A2	Bn-A02-p25260066	104.6	23337010	C	T	0.0543	102.7	106.9	2.31516e+07	2.35224e+07	0.09	C	0.361336
LR10	SY	N2	A3	Bn-A03-p6677819	50.49	5958648	C	T	0.1538	49.89	51.79	5.86922e+06	6.14611e+06	0.1	C	0.262987
LR10	SY	N2	A3	Bn-A03-p8681690	59.19	7968829	G	A	0.3678	58.59	60.39	7.89906e+06	8.0386e+06	0.12	G	0.227055
LR10	SY	N2	A4	Bn-A04-p11512379	22.1	12568660	T	C	0.0889	21.85	22.5	1.24217e+07	1.27104e+07	0.12	T	0.354686
LR10	SY	N2	A5	Bn-A05-p108510	1.23	122850	T	C	0.3846	1.23	1.23	35565.4	216431	0.11	C	0.224636
LR10	SY	N2	A5	Bn-A05-p4542257	34.83	4397445	T	C	0.2065	28.13	47.33	3.48982e+06	5.9504e+06	0.11	T	0.244415
LR10	SY	N2	A5	Bn-A02-p23251431	100.36	21465343	C	T	0.1739	95.22	100.36	2.08638e+07	2.13197e+07	0.16	T	0.345135
LR10	SY	N2	A6	Bn-A06-p24496051	116.66	23440008	C	T	0.4725	116.66	121.01	2.3326e+07	2.3554e+07	0.08	T	0.203482
LR10	SY	N2	A7	Bn-A02-p652623	30.35	13274819	G	A	0.05435	28.62	39.1	1.31372e+07	1.38321e+07	0.11	G	0.426772
LR10	SY	N2	A9	Bn-A09-p3064935	20.29	2999088	C	T	0.4302	6.39	39.99	989105	4.64059e+06	0.17	C	0.306653
LR10	SY	N2	A9	Bn-C9-p11083912	53.59	6379009	C	A	0.3077	49.89	53.59	5.8416e+06	6.52965e+06	0.11	A	0.219155
LR10	SY	N2	A10	Bn-A10-p15387634	65.4	16108511	G	A	0.0761	65.1	65.7	1.60255e+07	1.62051e+07	0.1	G	0.32166
LR10	SY	N2	C2	Bn-C2-p11994400	43	6558250	C	T	0.0989	35.7	43	6.35511e+06	6.76139e+06	0.08	C	0.319772
LR10	SY	N2	C2	Bn-C2-p51343986	134	44930141	A	G	0.4588	111.7	134	4.27218e+07	4.53139e+07	0.15	A	0.295342
LR10	SY	N2	C4	Bn-C4-p6677657	33.64	5898819	T	C	0.2527	33.64	34	5.88986e+06	5.90778e+06	0.1	T	0.215648
LR10	SY	N2	C5	Bn-C5-p43015091	93.36	40085855	C	T	0.1573	93.36	94.82	3.99843e+07	4.01874e+07	0.08	C	0.236918
LR10	SY	N2	C5	Bn-C5-p45854218	117.01	42566107	A	G	0.3043	117.01	118.51	4.24665e+07	4.26657e+07	0.1	A	0.201124
LR10	SY	N2	C6	Bn-C6-p4139088	74.58	32819428	T	G	0.1522	38.88	78.83	1.82933e+07	3.34724e+07	0.12	T	0.282016
LR10	SY	N2	C6	Bn-C6-p1034418	100.88	36178610	G	A	0.2472	100.88	100.88	3.6043e+07	3.63098e+07	0.09	G	0.222683
LR10	SY	N2	C7	Bn-C7-p37815425	57.5	34913509	C	T	0.3587	57.5	60.25	3.47302e+07	3.57496e+07	0.1	T	0.216401
LR10	SY	N2	C9	Bn-C9-p4989649	29.1	3592250	T	C	0.4186	16.3	55.5	574146	3.8351e+06	0.17	T	0.308796
LR10	SY	N2	C9	Bn-C9-p52263767	117.9	47544631	T	C	0.2527	109.2	117.9	4.66321e+07	4.84572e+07	0.08	T	0.210762
WOSR-69
Trial	Trait	N	LG	Marker (1)	Position (cM) (2)	Position (bp) (3)	Allele A (T)	Allele C (T)	MAF (5)	Start (cM) (6)	End (cM) (6)	Start (bp) (7)	End (bp) (7)	R² (8)	Favorable allele (9)	Allelic effect (10)
Ch14	O	N1	A1	Bn-A01-p1000115	3	617658	A	T	0.1667	1.9	3.63	463153	685037	0.24	T	1.0869
Ch14	O	N1	A1	Bn-A01-p24408637	73.4	20206563	T	C	0.4848	73.4	74.6	2.01174e+07	2.02957e+07	0.16	T	0.675407
Ch14	O	N1	A2	Bn-A02-p10753552	55.85	7580561	G	A	0.2174	55.1	55.85	7.20142e+06	7.9597e+06	0.15	A	0.790062
Ch14	O	N1	A3	Bn-A03-p2004585	14.09	1625180	G	T	0.0725	8.09	16.39	980474	2.01582e+06	0.24	G	1.47206
Ch14	O	N1	A4	Bn-A04-p11513352	22.1	12569734	G	A	0.0746	22.1	22.9	1.2494e+07	1.26455e+07	0.16	G	1.18106
Ch14	O	N1	A5	Bn-A05-p4549959	34.83	4405338	T	G	0.0579	33.42	39.93	3.89891e+06	4.71708e+06	0.17	T	1.36586
Ch14	O	N1	A5	Bn-A05-p21028051	74.43	19186008	C	T	0.0579	71.53	74.53	1.90481e+07	1.92608e+07	0.28	C	1.76951
Ch14	O	N1	A5	Bn-A02-p23095572	100.36	21629496	T	G	0.2029	95.73	105.83	2.08994e+07	23023824	0.2	G	0.982938
Ch14	O	N1	A7	Bn-A07-p1809446	3.55	1969464	T	C	0.0725	3.55	6.83	1.71185e+06	3.16796e+06	0.23	T	1.37207
Ch14	O	N1	A7	Bn-A07-p11330018	27.95	12682351	T	G	0.1884	27.95	28.25	1.25525e+07	1.28122e+07	0.17	T	0.862468
Ch14	O	N1	A8	Bn-A08-p13995190	17.97	11721976	A	G	0.3623	17.37	20.27	1.14914e+07	1.19526e+07	0.15	A	0.620233
Ch14	O	N1	A8	Bn-A08-p17772887	36.87	15222236	A	C	0.0597	36.87	39.74	1.5098e+07	1.53465e+07	0.15	A	1.27764
Ch14	O	N1	A9	Bn-A09-p3047090	20.29	2966543	T	C	0.4478	1.09	53.29	255419	6.55424e+06	0.3	T	0.991526
Ch14	O	N1	A10	Bn-C9-p44175086	16.5	11187117	A	G	0.0725	15.6	16.5	1.1018e+07	1.13562e+07	0.15	A	1.13225
Ch14	O	N1	C1	Bn-C1-p5199797	31.5	5036240	G	A	0.3088	31.29	35.84	4.85345e+06	6.56141e+06	0.2	A	0.834658
Ch14	O	N1	C2	Bn-C2-p51343986	134	44930141	A	G	0.4697	114.7	144.38	4.30907e+07	46139626	0.26	A	0.982206
Ch14	O	N1	C3	Bn-C3-p18628347	78.16	17264294	T	C	0.2319	77.62	79.26	1.69833e+07	1.75453e+07	0.16	T	0.75953
Ch14	O	N1	C3	Bn-C3-p30529798	115.26	28566199	T	C	0.0725	101.96	119.56	2.21033e+07	3.06671e+07	0.29	T	1.60698
Ch14	O	N1	C3	Bn-C3-p33853282	119.86	32548613	C	T	0.1159	119.86	120.16	3.20215e+07	3.29915e+07	0.17	C	1.01165
Ch14	O	N1	C3	Bn-C3-p58484016	163.86	54643883	C	A	0.1471	157.38	169.46	5.19622e+07	5.73756e+07	0.15	A	0.82491
Ch14	O	N1	C4	Bn-C4-p41508379	86.44	37397803	C	T	0.1014	72.64	87.84	3.08089e+07	3.83031e+07	0.17	C	1.00866
Ch14	O	N1	C7	Bn-C7-p34073742	47.28	31972295	C	A	0.1746	44.4	75.3	3.09566e+07	3.9493e+07	0.26	A	1.19108
Ch14	O	N1	C9	Bn-C9-p4989649	29.1	3592250	T	C	0.4127	16.3	55.5	566948	3.8423e+06	0.21	T	0.916099
Ch14	O	N2	A1	Bn-A01-p912298	3	530532	C	T	0.209	1.9	3.63	463153	685037	0.22	T	0.868597
Ch14	O	N2	A1	Bn-A01-p23330944	70.4	19203701	T	C	0.3636	70.1	70.4	1.90231e+07	1.97846e+07	0.21	C	0.744795
Ch14	O	N2	A2	Bn-A02-p10815571	61.7	7642009	C	T	0.1014	61.7	61.7	7.2645e+06	8.30609e+06	0.2	T	1.08583
Ch14	O	N2	A3	Bn-C3-p1855741	10.79	1129704	A	T	0.1884	8.09	12.39	971874	1.2901e+06	0.21	A	0.849997
Ch14	O	N2	A5	Bn-A02-p23095572	100.36	21629496	T	G	0.2029	97.47	105.83	2.10049e+07	23023824	0.28	G	1.00592
Ch14	O	N2	A9	Bn-A09-p1931318	14.19	2024483	A	G	0.3231	9.99	26.89	1.23662e+06	3.59174e+06	0.26	G	0.843962
Ch14	O	N2	A9	Bn-A09-p6950255	50.44	5891565	G	A	0.3676	49.89	50.44	5.72668e+06	6.05645e+06	0.17	A	0.651493
Ch14	O	N2	C2	Bn-C2-p51343986	134	44930141	A	G	0.4697	125.9	144.38	4.43112e+07	46139626	0.25	A	0.881443
Ch14	O	N2	C3	Bn-C3-p30529798	115.26	28566199	T	C	0.0725	112.26	117.56	2.53759e+07	2.95372e+07	0.18	T	1.15685
Ch14	O	N2	C7	Bn-C7-p37815425	57.5	34913509	C	T	0.4058	44.4	75.5	3.14602e+07	3.95975e+07	0.23	T	0.763302
Ch14	O	N2	C9	Bn-C9-p4989649	29.1	3592250	T	C	0.4127	29.1	29.1	3.40417e+06	3.78033e+06	0.21	T	0.821191
Ch14	O/Pr	N1	A1	Bn-A01-p1000115	3	617658	A	T	0.1667	1.9	3.63	463153	685037	0.19	T	0.15469
Ch14	O/Pr	N1	A2	Bn-A02-p10815571	55.85	7642009	C	T	0.1014	55.1	61.7	7.32606e+06	8.30598e+06	0.15	T	0.164314
Ch14	O/Pr	N1	A3	Bn-C3-p1855741	10.79	1129704	A	T	0.1884	8.09	14.29	980474	1.80911e+06	0.2	A	0.152205
Ch14	O/Pr	N1	A4	Bn-A04-p11513352	22.1	12569734	G	A	0.0746	21.85	22.5	1.24044e+07	1.27277e+07	0.17	G	0.199278
Ch14	O/Pr	N1	A5	Bn-A05-p21028051	74.43	19186008	C	T	0.0579	71.53	74.53	1.91205e+07	1.92743e+07	0.15	C	0.21112
Ch14	O/Pr	N1	A5	Bn-A02-p23251431	100.36	21465343	C	T	0.1739	98.13	103.23	2.10752e+07	2.23507e+07	0.14	T	0.145796
Ch14	O/Pr	N1	A7	Bn-A10-p11765520	3.85	2346921	G	A	0.0909	0.61	3.85	661114	3.74077e+06	0.21	G	0.1917
Ch14	O/Pr	N1	A9	Bn-A01-p9080359	15.89	2507380	C	A	0.4706	1.09	54.99	255496	7.24235e+06	0.3	C	0.169338
Ch14	O/Pr	N1	A9	Bn-A09-p25236454	76.19	23259026	A	G	0.0579	74.92	76.19	2.30017e+07	2.36212e+07	0.15	A	0.208949
Ch14	O/Pr	N1	A10	Bn-A10-p9052583	13.5	10444212	A	G	0.1014	12.9	16.2	1.0292e+07	1.10552e+07	0.14	A	0.160134
Ch14	O/Pr	N1	C1	Bn-C1-p5539398	33.43	5409479	G	A	0.25	31.29	66.34	4.85345e+06	6.22315e+06	0.19	A	0.129056
Ch14	O/Pr	N1	C1	Bn-C1-p32041396	71.54	30481283	G	A	0.0758	69.84	71.54	2.99324e+07	3.10302e+07	0.14	A	0.180903
Ch14	O/Pr	N1	C2	Bn-C7-p30930932	58	17119107	A	G	0.4348	58	107.7	1.65424e+07	4.22939e+07	0.15	G	0.110862
Ch14	O/Pr	N1	C2	Bn-C2-p51343986	134	44930141	A	G	0.4697	114.7	144.38	4.30907e+07	46139626	0.29	A	0.172252
Ch14	O/Pr	N1	C3	Bn-C3-p30529798	115.26	28566199	T	C	0.0725	114.66	117.56	2.77905e+07	2.93536e+07	0.2	T	0.216131
Ch14	O/Pr	N1	C3	Bn-C3-p58484016	163.86	54643883	C	A	0.1471	131.46	184.66	4.47572e+07	5.90545e+07	0.17	A	0.139221
Ch14	O/Pr	N1	C7	Bn-C7-p35541918	51	32869673	G	A	0.2174	44.4	75.3	3.09566e+07	3.9493e+07	0.21	A	0.158427
Ch14	O/Pr	N1	C9	Bn-C9-p4989649	29.1	3592250	T	C	0.4127	16.3	55.5	566948	3.8423e+06	0.22	T	0.153113
Ch14	O/Pr	N2	A2	Bn-A02-p10815571	55.85	7642009	C	T	0.1014	55.1	61.7	7.32606e+06	8.30598e+06	0.19	T	0.165257
Ch14	O/Pr	N2	A9	Bn-A01-p9080359	15.89	2507380	C	A	0.4706	13.69	26.89	1.57283e+06	3.59174e+06	0.26	C	0.138601
Ch14	O/Pr	N2	C2	Bn-C2-p51343986	134	44930141	A	G	0.4697	125.9	144.38	4.43112e+07	46139626	0.31	A	0.157889
Ch14	O/Pr	N2	C7	Bn-C7-p37815425	57.5	34913509	C	T	0.4058	56.57	60.25	3.46833e+07	3.57965e+07	0.22	T	0.117695
Ch14	O/Pr	N2	C9	Bn-C9-p4989649	29.1	3592250	T	C	0.4127	29.1	29.1	3.40417e+06	3.78033e+06	0.23	T	0.138725
Ch14	Pr	N1	A1	Bn-A01-p1000115	3	617658	A	T	0.1667	1	3.63	552401	682915	0.13	A	0.565739
Ch14	Pr	N1	A3	Bn-C3-p1855741	10.79	1129704	A	T	0.1884	8.09	12.39	971874	1.2901e+06	0.21	T	0.672373
Ch14	Pr	N1	A3	Bn-A03-p6274828	47.39	5625725	C	T	0.1176	46.59	51.79	5.53111e+06	6.07837e+06	0.15	T	0.630262
Ch14	Pr	N1	A4	Bn-A04-p11512379	22.1	12568660	T	C	0.1045	21.85	22.5	1.24044e+07	1.27277e+07	0.18	C	0.766857
Ch14	Pr	N1	A5	Bn-A05-p21028051	74.43	19186008	C	T	0.0579	71.53	74.53	1.91205e+07	1.92743e+07	0.13	T	0.854601
Ch14	Pr	N1	A7	Bn-A10-p11765520	3.85	2346921	G	A	0.0909	3.55	6.83	1.72703e+06	6.17289e+06	0.23	A	0.873171
Ch14	Pr	N1	A9	Bn-A01-p9080359	15.89	2507380	C	A	0.4706	8.36	44.19	1.04991e+06	5.11209e+06	0.3	A	0.728996
Ch14	Pr	N1	A9	Bn-A09-p6950255	50.44	5891565	G	A	0.3676	47.49	54.99	5.60863e+06	7.2847e+06	0.25	G	0.598359
Ch14	Pr	N1	A9	Bn-A09-p25236454	76.19	23259026	A	G	0.0579	74.92	76.19	2.30017e+07	2.36212e+07	0.18	G	1.00646
Ch14	Pr	N1	A10	Bn-A10-p9052583	13.5	10444212	A	G	0.1014	9.7	15.6	9.603e+06	1.09967e+07	0.16	G	0.739119
Ch14	Pr	N1	C1	Bn-C1-p5996736	35.56	5837173	A	C	0.1176	31.29	37.91	5.1455e+06	6.16651e+06	0.15	A	0.667609
Ch14	Pr	N1	C2	Bn-C7-p30930932	58	17119107	A	G	0.4348	58	69.85	1.57971e+07	2.00118e+07	0.15	A	0.475337
Ch14	Pr	N1	C2	Bn-C2-p51343986	134	44930141	A	G	0.4697	120.7	144.38	4.40542e+07	46139626	0.29	G	0.750852
Ch14	Pr	N1	C3	Bn-C3-p30529798	115.26	28566199	T	C	0.0725	114.66	117.56	2.77905e+07	2.93536e+07	0.21	C	0.968779
Ch14	Pr	N1	C3	Bn-C3-p58484016	163.86	54643883	C	A	0.1471	131.46	184.66	4.47572e+07	5.90545e+07	0.15	C	0.562377
Ch14	Pr	N1	C7	Bn-C7-p38504198	60.8	35328335	T	G	0.3188	44.4	75.5	3.14602e+07	3.95975e+07	0.17	G	0.547784
Ch14	Pr	N1	C9	Bn-C9-p4989649	29.1	3592250	T	C	0.4127	16.3	55.5	566948	3.8423e+06	0.22	C	0.665692
Ch14	Pr	N2	A3	Bn-A03-p6708217	50.79	5983756	C	T	0.1029	49.89	51.79	5.89593e+06	6.07159e+06	0.2	T	0.854988
Ch14	Pr	N2	A9	Bn-A01-p9080359	15.89	2507380	C	A	0.4706	15.59	22.59	2.11416e+06	3.41056e+06	0.24	A	0.69382
Ch14	Pr	N2	C2	Bn-C2-p51343986	134	44930141	A	G	0.4697	125.9	144.38	4.43112e+07	46139626	0.3	G	0.803928
Ch14	Pr	N2	C9	Bn-C9-p4989649	29.1	3592250	T	C	0.4127	29.1	29.1	3.40417e+06	3.78033e+06	0.21	C	0.692425
Ch14	SN	N2	A3	Bn-A03-p708787	3.69	573276	T	C	0.303	1.09	5.79	403759	804239	0.25	T	5722.02
Ch14	SY	N2	A1	Bn-A01-p5469727	35.2	5034408	T	C	0.3433	34.9	36.4	4.95631e+06	5.14895e+06	0.13	C	3.16612
Ch14	SY	N2	A3	Bn-A03-p708787	3.69	573276	T	C	0.303	1.09	21.29	160382	2.36748e+06	0.24	T	5.13637
Ch14	SY	N2	A3	Bn-A03-p18571065	104.49	17578082	T	C	0.1014	64.59	105.09	9.86576e+06	1.77145e+07	0.16	T	5.4084
Ch14	SY	N2	A4	Bn-A04-p874008	1	750393	G	A	0.1014	1	1.6	609679	891107	0.12	G	4.78343
Ch14	SY	N2	A4	Bn-A04-p6968899	9.8	8255363	A	G	0.1304	8.72	10.06	8.05909e+06	8.46373e+06	0.15	A	4.76167
Ch14	SY	N2	A4	Bn-A04-p7808804	10.9	9129939	C	T	0.1212	10.9	18.5	8.98066e+06	1.20226e+07	0.19	C	5.88845
Ch14	SY	N2	A4	Bn-A04-p11513352	22.1	12569734	G	A	0.0746	21.85	22.5	1.24044e+07	1.27277e+07	0.15	G	6.09928
Ch14	SY	N2	A4	Bn-A04-p13705636	40	14344609	A	G	0.3676	40	40	1.37621e+07	1.48501e+07	0.14	A	3.39644
Ch14	SY	N2	A5	Bn-A05-p4068277	32.13	3929112	T	C	0.3582	24.26	34.83	3.18317e+06	4.47956e+06	0.2	T	4.07816
Ch14	SY	N2	A5	Bn-A05-p5770114	44.63	5501463	T	G	0.1045	42.03	49.13	5.13272e+06	6.71755e+06	0.16	T	5.14456
Ch14	SY	N2	A5	Bn-A05-p20461727	67.23	18662780	C	T	0.2754	66.32	67.23	1.85786e+07	1.8742e+07	0.17	C	3.75116
Ch14	SY	N2	A5	Bn-A05-p21006621	69.73	19166297	T	G	0.1014	69.73	74.53	1.91029e+07	1.92296e+07	0.12	T	4.64711
Ch14	SY	N2	A5	Bn-A05-p23588992	103.23	22648191	C	A	0.2319	103.23	105.83	2.23694e+07	2.28841e+07	0.14	A	3.94047
Ch14	SY	N2	A7	Bn-A07-p3202245	5.05	5145303	G	T	0.3913	5.05	6.83	4.57677e+06	5.71384e+06	0.13	G	3.22085
Ch14	SY	N2	A7	Bn-A07-p13873942	49.75	15819511	T	C	0.4412	47.65	50.15	1.57335e+07	1.59055e+07	0.14	T	3.33861
Ch14	SY	N2	A8	Bn-A08-p21070052	69.17	18649173	G	A	0.2353	69.17	69.17	1.85909e+07	1.87074e+07	0.12	G	3.6258
Ch14	SY	N2	A9	Bn-A09-p3097420	20.59	3031214	A	C	0.4697	8.36	44.29	1.0474e+06	5.07562e+06	0.21	A	4.54277
Ch14	SY	N2	A10	Bn-A10-p9459037	15.6	10898336	C	T	0.1014	9.7	15.6	9.603e+06	1.09967e+07	0.16	C	5.52842
Ch14	SY	N2	C2	Bn-C2-p51343986	134	44930141	A	G	0.4697	125.9	144.38	4.43112e+07	46139626	0.22	A	4.95536
Ch14	SY	N2	C3	Bn-C3-p31143746	116.16	29866904	C	T	0.1594	114.66	119.56	2.78379e+07	3.06069e+07	0.15	C	4.54007
Ch14	SY	N2	C4	Bn-C4-p4822834	40.24	4137971	A	C	0.1594	23.1	40.24	3.85481e+06	7.10175e+06	0.15	A	4.3625
Ch14	SY	N2	C4	Bn-Scaffold09888-p365	88.77	38800466	G	T	0.1642	87.84	90.63	3.82218e+07	3.99896e+07	0.15	G	4.19791
Ch14	SY	N2	C6	Bn-C6-p25754041	34.07	12756504	C	A	0.05797	24.38	35.58	1.22518e+07	1.30392e+07	0.18	C	6.79649
Ch14	SY	N2	C6	Bn-C6-p12910270	61.18	24497200	A	C	0.1912	47.08	61.18	1.94917e+07	2.4836e+07	0.16	A	3.89394
Ch14	SY	N2	C7	Bn-C7-p35406848	50.4	32746032	C	T	0.2206	44.4	75.5	3.14602e+07	3.95975e+07	0.2	T	4.97353
Ch14	SY	N2	C7	Bn-C7-p47677801	93.9	44239081	G	A	0.1884	93.67	93.9	4.41472e+07	4.43887e+07	0.13	G	3.48294
Ch14	SY	N2	C8	Bn-A09-p34591600	93.1	36034772	G	A	0.4348	89.2	94.3	3.59171e+07	3.61524e+07	0.15	G	3.30047
Ch14	SY	N2	C9	Bn-C9-p4989649	29.1	3592250	T	C	0.4127	16.3	55.5	566948	3.8423e+06	0.18	T	4.52196
Ch14	TSW	N2	A5	Bn-A05-p20390129	66.33	18603447	T	C	0.4348	63.63	66.33	1.85211e+07	1.86901e+07	0.15	T	0.140872
Ch14	TSW	N2	A6	Bn-A06-p22051862	99.81	21087697	C	A	0.4783	99.21	99.81	2.10472e+07	2.11282e+07	0.17	A	0.148471
Ch14	TSW	N2	A6	Bn-A06-p22605217	102.51	21643954	A	G	0.4928	102.51	105.31	2.15885e+07	2.16994e+07	0.17	A	0.147979
Ch14	TSW	N2	A7	Bn-A10-p11527601	3.55	2647213	C	T	0.2239	3.55	5.05	1.74094e+06	6.8642e+06	0.18	T	0.18319
Ch14	TSW	N2	A10	Bn-A10-p9118672	13.8	10516268	A	C	0.0725	13.5	14.4	1.041e+07	1.06225e+07	0.16	A	0.276918
Ch14	TSW	N2	C1	Bn-C1-p34387623	73.84	32424061	C	A	0.3333	67.54	75.04	3.07762e+07	3.30345e+07	0.16	C	0.152665
Ch14	TSW	N2	C1	Bn-A01-p24858036	88.44	36526858	G	A	0.2941	83.19	88.74	3.59752e+07	3.70785e+07	0.16	A	0.156956
Ch14	TSW	N2	C3	Bn-C3-p21482716	85.46	19662101	A	G	0.3478	84.46	85.46	1.96148e+07	1.97094e+07	0.15	G	0.148242
Ch14	TSW	N2	C4	Bn-C4-p6211197	32.34	5444092	G	A	0.0725	30.64	34.34	5.19598e+06	6.05147e+06	0.15	G	0.272141
Ch14	TSW	N2	C4	Bn-C4-p42797638	88.77	38776246	A	C	0.1618	87.84	90.63	3.82234e+07	3.9963e+07	0.18	A	0.206104
Ch14	TSW	N2	C5	Bn-C5-p4837700	42.04	4661080	A	G	0.3913	36	42.04	4.27728e+06	5.28369e+06	0.18	G	0.156304
Ch14	TSW	N2	C5	Bn-C5-p6608933	43.01	6206650	A	C	0.4265	42.71	45.81	5.66678e+06	6.75856e+06	0.19	C	0.161075
Ch14	TSW	N2	C8	Bn-Scaffold00766-p24000	4	12807153	A	G	0.3382	4	4	3.0406e+06	3.60117e+06	0.19	A	0.168498
Ch14	TSW	N2	C9	Bn-C9-p20020394	59.9	16874147	G	A	0.4348	59.3	59.9	1.65599e+07	1.73122e+07	0.16	G	0.144791
Dij14	O	N1	A1	Bn-A01-p2569303	17.3	2070633	C	T	0.0735	14.9	17.3	2.01387e+06	2.1274e+06	0.09	C	1.09915
Dij14	O	N1	A1	Bn-A01-p6854917	43.4	6267249	A	C	0.1343	42.2	43.7	6.17028e+06	6.3479e+06	0.11	C	0.954528
Dij14	O	N1	A2	Bn-A02-p3860483	21.9	1279875	G	T	0.1061	16.7	21.9	993476	1.5652e+06	0.22	G	1.35717
Dij14	O	N1	A3	Bn-C3-p1855741	10.79	1129704	A	T	0.1884	7.69	15.49	953959	1.8563e+06	0.13	A	0.883334
Dij14	O	N1	A3	Bn-A03-p7015536	52.39	6299191	A	G	0.0746	51.79	54.49	6.20047e+06	6.39791e+06	0.09	A	1.2216
Dij14	O	N1	A3	Bn-C3-p23473421	85.69	14622515	C	T	0.0579	82.99	85.69	1.45292e+07	1.47158e+07	0.16	C	1.51479
Dij14	O	N1	A4	Bn-A04-p2921832	5.2	2576018	G	A	0.3088	3.8	5.2	2.11658e+06	2.9518e+06	0.11	G	0.703119
Dij14	O	N1	A5	Bn-A05-p5446122	43.13	5230858	C	A	0.0725	41.73	44.63	4.91702e+06	5.56803e+06	0.09	C	1.12602
Dij14	O	N1	A5	Bn-A05-p17913760	54.63	16223676	C	T	0.1159	54.63	56.43	1.59977e+07	1.6413e+07	0.2	C	1.24643
Dij14	O	N1	A5	Bn-A05-p21029910	74.43	19187866	T	C	0.0579	68.72	74.53	1.90142e+07	1.92721e+07	0.19	T	1.68948
Dij14	O	N1	A6	Bn-A06-p1909050	11.21	1866314	T	C	0.1176	10.31	11.21	1.8103e+06	1.92233e+06	0.09	T	0.908564
Dij14	O	N1	A6	Bn-A08-p4636503	57.81	6191225	G	A	0.4783	57.81	60.21	6.03019e+06	6.35226e+06	0.11	G	0.663899
Dij14	O	N1	A6	Bn-A06-p16682224	76.51	18169871	G	A	0.0579	76.04	76.51	1.80817e+07	1.82581e+07	0.13	G	1.62466
Dij14	O	N1	A7	Bn-A07-p1197450	3.25	886797	C	T	0.0758	0.61	3.25	661114	3.74077e+06	0.16	C	1.35352
Dij14	O	N1	A7	Bn-A07-p11330018	27.95	12682351	T	G	0.1884	27.95	28.25	1.25525e+07	1.28122e+07	0.09	T	0.803414
Dij14	O	N1	A7	Bn-A07-p12609202	40.95	14713065	G	A	0.1304	40.35	40.95	1.46364e+07	1.47897e+07	0.12	A	1.02692
Dij14	O	N1	A7	Bn-A07-p16574221	64.35	18554102	A	C	0.3636	64.35	64.65	1.84228e+07	1.86854e+07	0.1	A	0.680703
Dij14	O	N1	A7	Bn-A07-p22169573	93.65	23556301	C	T	0.1029	90.65	93.65	2.32802e+07	2.37867e+07	0.09	T	0.968254
Dij14	O	N1	A8	Bn-C5-p6374716	11.17	895161	C	T	0.3478	1.17	11.17	515426	1.43553e+06	0.19	C	0.831189
Dij14	O	N1	A8	Bn-A08-p13409843	16.57	11154453	G	A	0.3188	16.57	21.17	1.06487e+07	1.21669e+07	0.24	G	0.929211
Dij14	O	N1	A8	Bn-A08-p14784965	21.17	12346571	A	C	0.1884	21.17	21.97	1.22517e+07	1.2447e+07	0.09	A	0.762498
Dij14	O	N1	A9	Bn-C9-p17032242	60.39	9616856	T	G	0.4928	59.79	60.61	9.30597e+06	9.92774e+06	0.11	T	0.631801
Dij14	O	N1	A9	Bn-A09-p25236454	76.19	23259026	A	G	0.0579	66.99	76.19	1.63402e+07	2.33649e+07	0.27	A	1.96103
Dij14	O	N1	A10	Bn-A10-p7078767	9.2	8667939	T	C	0.1159	5.7	12.9	8.49039e+06	1.02905e+07	0.18	T	1.19376
Dij14	O	N1	A10	Bn-A10-p9241008	14.4	10643314	A	G	0.0725	13.5	15	1.041e+07	1.07841e+07	0.1	A	1.1543
Dij14	O	N1	A10	Bn-C9-p44175086	16.5	11187117	A	G	0.0725	15.6	22.4	1.10012e+07	1.203e+07	0.18	A	1.45478
Dij14	O	N1	A10	Bn-C9-p47829700	31.6	13091538	C	T	0.0725	31.6	31.6	1.30292e+07	1.31538e+07	0.1	C	1.16014
Dij14	O	N1	A10	Bn-A10-p15167470	52.6	15100332	C	T	0.0882	44.6	62.1	1.45268e+07	1.57489e+07	0.2	C	1.50512
Dij14	O	N1	C1	Bn-C1-p5539398	33.43	5409479	G	A	0.25	31.29	33.43	5.1455e+06	5.73269e+06	0.1	A	0.726723
Dij14	O	N1	C1	Bn-C1-p6460576	37.91	6238610	A	G	0.1045	32.24	37.91	5.77163e+06	6.70559e+06	0.09	G	0.952203
Dij14	O	N1	C1	Bn-C1-p33522942	69.64	31609109	C	A	0.1194	67.54	75.04	3.10624e+07	3.30065e+07	0.13	C	1.03335
Dij14	O	N1	C1	Bn-A08-p8249952	88.74	37497099	A	C	0.4783	88.44	88.74	3.73768e+07	3.76174e+07	0.11	A	0.663899
Dij14	O	N1	C2	Bn-A08-p6157861	34.8	6070165	C	T	0.4783	32.9	67.9	5.22056e+06	2.33754e+07	0.11	C	0.663899
Dij14	O	N1	C3	Bn-C3-p21737145	87.61	19920312	G	A	0.0923	85.7608	101.961	1.97441e+07	2.21103e+07	0.1	G	1.02519
Dij14	O	N1	C3	Bn-C3-p25397175	107.96	23299456	T	C	0.2899	104.326	107.96	2.24484e+07	2.27981e+07	0.09	T	0.660368
Dij14	O	N1	C3	Bn-C3-p31143746	116.16	29866904	C	T	0.1594	115.26	119.561	2.98687e+07	3.07066e+07	0.1	C	0.898263
Dij14	O	N1	C3	Bn-C3-p36355700	128.46	34660968	A	C	0.1449	128.461	131.061	3.42482e+07	3.53139e+07	0.12	A	0.938854
Dij14	O	N1	C3	Bn-C3-p53259314	145.36	49313936	G	A	0.4783	139.061	153.061	4.76188e+07	5.13583e+07	0.2	A	0.885955
Dij14	O	N1	C3	Bn-C3-p63557075	184.96	59368054	A	G	0.2464	184.661	190.161	5.88879e+07	6.03017e+07	0.18	A	0.88723
Dij14	O	N1	C4	Bn-C4-p10995381	48.64	9885379	A	C	0.0725	47.94	51.74	9.49961e+06	1.02712e+07	0.1	C	1.1915
Dij14	O	N1	C4	Bn-C3-p57435791	60.04	23169244	C	T	0.3478	60.04	97.89	2.28556e+07	4.29677e+07	0.23	T	0.949826
Dij14	O	N1	C4	Bn-C4-p51020311	122.34	46169247	A	C	0.1594	121.84	122.56	4.60043e+07	4.63368e+07	0.13	A	0.950731
Dij14	O	N1	C5	Bn-C5-p900445	5.01	902599	T	C	0.0588	5.01	8.01	822545	982653	0.1	C	1.29291
Dij14	O	N1	C5	Bn-A05-p17895197	68.45	33068692	C	G	0.1449	68.45	68.45	3.305e+07	3.30861e+07	0.16	C	1.042
Dij14	O	N1	C6	Bn-C6-p31047939	28.28	7926399	C	A	0.3382	27.68	28.28	7.57006e+06	8.23738e+06	0.09	A	0.637295
Dij14	O	N1	C6	Bn-C6-p17272689	48.58	20178056	A	G	0.1061	47.68	51.68	1.98858e+07	2.04703e+07	0.09	A	0.942768
Dij14	O	N1	C6	Bn-C6-p2132472	90.48	35006174	C	A	0.2174	87.48	94.98	3.46779e+07	3.53344e+07	0.1	C	0.781332
Dij14	O	N1	C7	Bn-C7-p43385270	77.1	40104047	C	T	0.1176	76.2	79.58	3.99337e+07	4.02757e+07	0.1	T	0.997458
Dij14	O	N1	C7	Bn-C7-p45273083	86.6	41821480	T	C	0.05797	84.8	86.9	4.16866e+07	4.19563e+07	0.15	T	1.49888
Dij14	O	N1	C8	Bn-A08-p6162660	5.8	14268480	G	A	0.4783	4	31.8	687169	2.13759e+07	0.11	G	0.663899
Dij14	O	N1	C9	Bn-C3-p56764646	59.3	20517280	G	A	0.3478	59.3	59.3	2.04117e+07	2.06232e+07	0.17	A	0.832972
Dij14	O	N1	C9	Bn-C9-p51356975	109.2	46646159	A	C	0.1029	98.6	117.9	4.55148e+07	4.78799e+07	0.12	A	1.09144
Dij14	O	N2	A2	Bn-A02-p3860483	21.9	1279875	G	T	0.1061	16.7	21.9	993476	1.5652e+06	0.25	G	1.17697
Dij14	O	N2	A3	Bn-C3-p1855741	10.79	1129704	A	T	0.1884	8.09	12.39	971874	1.2901e+06	0.2	A	0.845382
Dij14	O	N2	A5	Bn-A05-p17241091	53.13	14207054	T	G	0.0725	52.13	53.13	1.36233e+07	1.48042e+07	0.17	T	1.18595
Dij14	O	N2	A5	Bn-A05-p21028051	74.43	19186008	C	T	0.0579	71.53	74.53	1.90481e+07	1.92721e+07	0.32	C	1.74071
Dij14	O	N2	A5	Bn-A05-p22351135	92.7	20415711	C	T	0.0909	90.83	92.7	2.02923e+07	2.05391e+07	0.2	C	1.12081
Dij14	O	N2	A7	Bn-A07-p11330018	27.95	12682351	T	G	0.1884	27.95	27.95	1.26663e+07	1.26984e+07	0.21	T	0.89726
Dij14	O	N2	A8	Bn-A08-p13856852	17.37	11586387	C	T	0.2899	11.17	21.17	1.06295e+07	1.21667e+07	0.19	C	0.714909
Dij14	O	N2	A9	Bn-A09-p25236454	76.19	23259026	A	G	0.05797	74.92	76.19	2.30017e+07	2.36212e+07	0.31	A	1.72197
Dij14	O	N2	A10	Bn-A10-p7078767	9.2	8667939	T	C	0.1159	5.7	9.2	8.32038e+06	8.90266e+06	0.22	T	1.078
Dij14	O	N2	A10	Bn-C9-p44175086	16.5	11187117	A	G	0.0725	15.6	16.5	1.1018e+07	1.13562e+07	0.21	A	1.30008
Dij14	O	N2	C1	Bn-C1-p5539398	33.43	5409479	G	A	0.25	31.29	33.43	5.1455e+06	5.73269e+06	0.18	A	0.756359
Dij14	O	N2	C3	Bn-C3-p30529798	115.26	28566199	T	C	0.0725	111.66	119.56	2.4773e+07	3.06084e+07	0.35	T	1.63562
Dij14	O	N2	C3	Bn-C3-p33853282	119.86	32548613	C	T	0.1159	119.86	120.16	3.21057e+07	3.29915e+07	0.19	C	1.01111
Dij14	O	N2	C3	Bn-C3-p51012844	134.86	46916274	A	G	0.0725	131.46	134.86	4.64629e+07	4.73697e+07	0.23	A	1.35165
Dij14	O/Pr	N1	A2	Bn-A02-p3860483	21.9	1279875	G	T	0.1061	16.7	21.9	993476	1.5652e+06	0.17	G	0.307309
Dij14	O/Pr	N1	A2	Bn-A02-p8391383	48.9	5341610	T	G	0.1739	45.6	55.1	4.74513e+06	6.27911e+06	0.12	G	0.222895
Dij14	O/Pr	N1	A3	Bn-C3-p1855741	10.79	1129704	A	T	0.1884	8.09	12.39	971874	1.28753e+06	0.11	A	0.215114
Dij14	O/Pr	N1	A3	Bn-A03-p6288173	47.39	5638047	C	T	0.0746	46.59	48.99	5.54483e+06	5.73126e+06	0.11	C	0.296221
Dij14	O/Pr	N1	A3	Bn-C3-p23473421	85.69	14622515	C	T	0.0579	82.99	85.69	1.45292e+07	1.47158e+07	0.11	C	0.335425
Dij14	O/Pr	N1	A3	Bn-A03-p23608564	128.99	22176549	A	G	0.1159	126.09	129.29	2.19318e+07	2.23508e+07	0.13	G	0.26666
Dij14	O/Pr	N1	A4	Bn-A04-p2921832	5.2	2576018	G	A	0.3088	4.4	6.4	2.14269e+06	3.04041e+06	0.14	G	0.194356
Dij14	O/Pr	N1	A4	Bn-A04-p6319430	8.72	7548923	G	T	0.0579	8.22	8.72	7.28932e+06	7.92606e+06	0.1	T	0.335811
Dij14	O/Pr	N1	A6	Bn-A08-p4636503	57.81	6191225	G	A	0.4783	57.81	57.81	6.1421e+06	6.24035e+06	0.13	G	0.177838
Dij14	O/Pr	N1	A7	Bn-A10-p12226123	7.6	2910343	T	C	0.0615	0.61	7.6	661993	3.74077e+06	0.13	T	0.331725
Dij14	O/Pr	N1	A7	Bn-A07-p22169573	93.65	23556301	C	T	0.1029	90.65	93.65	2.32802e+07	2.37867e+07	0.12	T	0.27143
Dij14	O/Pr	N1	A8	Bn-A08-p2415846	2.37	1865543	A	C	0.4688	1.17	2.37	363405	1.95977e+06	0.18	C	0.214268
Dij14	O/Pr	N1	A8	Bn-A08-p12360518	9.37	10182223	G	A	0.3043	4.97	25.97	5.89361e+06	1.31647e+07	0.33	A	0.306622
Dij14	O/Pr	N1	A8	Bn-A08-p17648611	36.87	15095324	A	G	0.1739	36.87	36.87	1.49475e+07	1.54376e+07	0.11	G	0.209925
Dij14	O/Pr	N1	A9	Bn-C9-p17032242	60.39	9616856	T	G	0.4928	59.79	60.61	9.30597e+06	9.92774e+06	0.11	T	0.162402
Dij14	O/Pr	N1	A9	Bn-A09-p25236454	76.19	23259026	A	G	0.0579	74.92	76.19	2.30017e+07	2.36212e+07	0.15	A	0.390566
Dij14	O/Pr	N1	A9	Bn-C8-p38444947	119.39	31722594	G	T	0.2462	119.39	119.99	3.15319e+07	3.19133e+07	0.09	T	0.184656
Dij14	O/Pr	N1	A10	Bn-A10-p9118672	13.8	10516268	A	C	0.0725	0.4	33	0	1.33813e+07	0.19	C	0.387166
Dij14	O/Pr	N1	A10	Bn-A10-p15167470	52.6	15100332	C	T	0.0882	49.7	59.3	1.49633e+07	1.55256e+07	0.11	C	0.298188
Dij14	O/Pr	N1	C1	Bn-C1-p33522942	69.64	31609109	C	A	0.1194	67.54	73.84	3.10624e+07	3.24926e+07	0.16	C	0.283125
Dij14	O/Pr	N1	C1	Bn-A08-p8249952	88.74	37497099	A	C	0.4783	88.44	88.74	3.73768e+07	3.76174e+07	0.13	A	0.177838
Dij14	O/Pr	N1	C2	Bn-C2-p11878110	43	9343034	G	A	0.1014	33.5	46.6	5.34343e+06	1.07922e+07	0.14	A	0.289101
Dij14	O/Pr	N1	C3	Bn-C3-p21737145	87.61	19920312	G	A	0.0923	84.46	123.7	1.94025e+07	3.36216e+07	0.1	G	0.255577
Dij14	O/Pr	N1	C3	Bn-C3-p53619696	146.76	49615795	G	T	0.4203	139.061	153.061	4.76188e+07	5.13583e+07	0.17	G	0.19275
Dij14	O/Pr	N1	C3	Bn-C3-p59307101	162.96	55713088	C	T	0.3088	162.96	172.561	5.58738e+07	5.75359e+07	0.45	T	0.339615
Dij14	O/Pr	N1	C3	Bn-C3-p61594716	172.56	57590701	C	T	0.2794	172.561	189.861	57590701	6.02029e+07	0.16	C	0.207564
Dij14	O/Pr	N1	C4	Bn-C3-p57435791	60.03	23169244	C	T	0.3478	4.74	75.24	713488	3.20817e+07	0.33	T	0.28682
Dij14	O/Pr	N1	C5	Bn-C5-p8459472	50.11	7834764	T	C	0.0882	49.31	50.83	7.40601e+06	8.26352e+06	0.14	C	0.308121
Dij14	O/Pr	N1	C5	Bn-A05-p17895197	68.45	33068692	C	G	0.1449	68.45	68.45	3.305e+07	3.30861e+07	0.15	C	0.256445
Dij14	O/Pr	N1	C6	Bn-A03-p23607037	2.38	1367580	G	T	0.1159	0	35.58	814427	1.92073e+06	0.13	T	0.26666
Dij14	O/Pr	N1	C7	Bn-C7-p43385270	77.1	40104047	C	T	0.1176	76.2	79.58	3.99362e+07	4.06048e+07	0.17	T	0.331068
Dij14	O/Pr	N1	C7	Bn-C7-p45273083	86.6	41821480	T	C	0.0579	84.8	86.9	4.16866e+07	4.19563e+07	0.13	T	0.365562
Dij14	O/Pr	N1	C8	Bn-A08-p6162660	5.8	14268480	G	A	0.4783	4	31.8	687169	2.13759e+07	0.13	G	0.177838
Dij14	O/Pr	N1	C8	Bn-C8-p39994080	96.4	37155504	C	A	0.3235	91.6	100.77	3.57919e+07	3.72694e+07	0.14	A	0.192383
Dij14	O/Pr	N1	C9	Bn-C9-p16918552	59.1	13746509	C	T	0.2029	57.66	59.1	1.34246e+07	1.40684e+07	0.1	T	0.203168
Dij14	O/Pr	N1	C9	Bn-C3-p56764646	59.3	20517280	G	A	0.3478	59.3	59.3	2.04117e+07	2.06232e+07	0.29	A	0.267235
Dij14	O/Pr	N1	C9	Bn-A08-p5266776	62.6	23701973	A	G	0.4706	62.6	62.6	2.36854e+07	2.37186e+07	0.1	A	0.164381
Dij14	O/Pr	N2	A2	Bn-A02-p3860483	21.9	1279875	G	T	0.1061	16.7	21.9	993476	1.5652e+06	0.28	G	0.116539
Dij14	O/Pr	N2	A5	Bn-A05-p17241091	53.13	14207054	T	G	0.0725	52.13	53.13	1.36233e+07	1.48042e+07	0.22	T	0.125253
Dij14	O/Pr	N2	A5	Bn-A05-p21028051	74.43	19186008	C	T	0.0579	71.53	74.53	1.91205e+07	1.92743e+07	0.22	C	0.138503
Dij14	O/Pr	N2	A9	Bn-A09-p25236454	76.19	23259026	A	G	0.0579	74.92	76.19	2.30017e+07	2.36212e+07	0.26	A	0.148972
Dij14	O/Pr	N2	A10	Bn-A10-p7078767	9.2	8667939	T	C	0.1159	5.7	9.2	8.48877e+06	8.84711e+06	0.23	T	0.103866
Dij14	O/Pr	N2	C3	Bn-C3-p28956782	114.36	26681736	T	C	0.194	112.26	114.36	2.54818e+07	2.78928e+07	0.21	T	0.0883069
Dij14	O/Pr	N2	C3	Bn-C3-p30529798	115.26	28566199	T	C	0.0725	114.66	131.46	2.8164e+07	4.73185e+07	0.3	T	0.142425
Dij14	Pr	N1	A2	Bn-A02-p3860483	21.9	1279875	G	T	0.1061	16.7	21.9	993476	1.5652e+06	0.22	T	1.28465
Dij14	Pr	N1	A2	Bn-A02-p8344540	48.9	5309290	G	A	0.1846	45.9	49.2	4.7848e+06	5.83378e+06	0.09	G	0.755135
Dij14	Pr	N1	A3	Bn-C3-p1855741	10.79	1129704	A	T	0.1884	8.09	12.39	971874	1.28753e+06	0.11	T	0.804799
Dij14	Pr	N1	A3	Bn-C3-p23473421	85.69	14622515	C	T	0.0579	46.59	91.39	5.39885e+06	1.52888e+07	0.17	T	1.50118
Dij14	Pr	N1	A3	Bn-A03-p23253636	127.89	22038326	C	T	0.4348	126.09	129.29	2.19318e+07	2.22853e+07	0.09	C	0.596141
Dij14	Pr	N1	A4	Bn-A04-p2921832	5.2	2576018	G	A	0.3088	4.4	6.4	2.14269e+06	3.04041e+06	0.15	A	0.754198
Dij14	Pr	N1	A5	Bn-A05-p17241091	53.13	14207054	T	G	0.0725	52.13	53.13	1.36233e+07	1.48042e+07	0.09	G	1.10212
Dij14	Pr	N1	A5	Bn-A05-p16735186	53.13	15422887	A	G	0.1045	53.13	53.13	1.51761e+07	1.56697e+07	0.13	G	1.04194
Dij14	Pr	N1	A5	Bn-A05-p17913760	54.63	16223676	C	T	0.1159	54.62	56.43	1.60294e+07	1.64179e+07	0.19	T	1.1588
Dij14	Pr	N1	A6	Bn-A08-p4636503	57.81	6191225	G	A	0.4783	57.81	57.81	6.1421e+06	6.24035e+06	0.1	A	0.618152
Dij14	Pr	N1	A7	Bn-A10-p12226123	7.6	2910343	T	C	0.0615	2.95	7.6	661993	3.74077e+06	0.16	C	1.33956
Dij14	Pr	N1	A8	Bn-C5-p6374716	1.77	895161	C	T	0.3478	0	2.37	55487.1	1.5956e+06	0.15	T	0.731126
Dij14	Pr	N1	A8	Bn-A08-p12360518	9.37	10182223	G	A	0.3043	4.97	25.97	5.89361e+06	1.31587e+07	0.27	G	1.05188
Dij14	Pr	N1	A8	Bn-A08-p17859330	36.87	15312156	C	T	0.3043	36.87	36.87	1.51927e+07	1.54316e+07	0.09	C	0.653176
Dij14	Pr	N1	A9	Bn-C9-p17032242	60.39	9616856	T	G	0.4928	59.79	60.61	9.30597e+06	9.92774e+06	0.11	G	0.60758
Dij14	Pr	N1	A9	Bn-A09-p25236454	76.19	23259026	A	G	0.0579	66.99	76.19	1.63402e+07	2.33649e+07	0.19	G	1.59644
Dij14	Pr	N1	A9	Bn-A09-p36456115	126.29	33463956	T	G	0.0882	121.89	126.69	3.25967e+07	3.36878e+07	0.12	G	1.07183
Dij14	Pr	N1	A10	Bn-A10-p7078767	9.2	8667939	T	C	0.1159	7.7	9.2	8.39949e+06	9.20857e+06	0.21	C	1.21088
Dij14	Pr	N1	A10	Bn-A10-p9118672	13.8	10516268	A	C	0.0725	12.9	15	1.03653e+07	1.0782e+07	0.14	A	1.29786
Dij14	Pr	N1	A10	Bn-C9-p47829700	31.6	13091538	C	T	0.0725	31.6	31.6	1.30292e+07	1.31538e+07	0.09	T	1.06341
Dij14	Pr	N1	A10	Bn-A10-p13162021	32.3	13203275	G	A	0.4493	31.6	32.7	1.31451e+07	1.32615e+07	0.09	A	0.592519
Dij14	Pr	N1	A10	Bn-A10-p14772624	46.9	14725387	A	C	0.0725	44.6	48.6	1.45249e+07	1.49258e+07	0.1	C	1.1004
Dij14	Pr	N1	A10	Bn-A10-p15167470	52.6	15100332	C	T	0.0882	49.7	61.8	1.49657e+07	1.57037e+07	0.13	T	1.20992
Dij14	Pr	N1	A10	Bn-A10-p16752445	67.5	16549748	T	C	0.0746	66.9	68.1	1.64324e+07	1.66548e+07	0.12	C	1.17105
Dij14	Pr	N1	C1	Bn-C1-p1310534	8.84	1033157	T	C	0.0769	2.34	11.14	713585	1.35273e+06	0.1	C	1.14366
Dij14	Pr	N1	C1	Bn-C1-p6460576	37.91	6238610	A	G	0.1045	32.24	37.91	5.77163e+06	6.70559e+06	0.09	A	0.907961
Dij14	Pr	N1	C1	Bn-C1-p33522942	69.64	31609109	C	A	0.1194	69.64	74.14	3.08511e+07	3.26088e+07	0.21	A	1.1876
Dij14	Pr	N1	C1	Bn-C1-p36765089	77.44	34501443	T	C	0.0758	76.54	80.04	3.39264e+07	3.54406e+07	0.11	C	1.08412
Dij14	Pr	N1	C1	Bn-A08-p8249952	88.74	37497099	A	C	0.4783	88.44	88.74	3.73768e+07	3.76174e+07	0.1	C	0.618152
Dij14	Pr	N1	C2	Bn-C2-p11878110	43	9343034	G	A	0.1014	40.2	45.4	8.6163e+06	1.00698e+07	0.12	G	1.03306
Dij14	Pr	N1	C3	Bn-C3-p21737145	87.61	19920312	G	A	0.0923	73.8608	131.461	1.48394e+07	4.73185e+07	0.13	A	1.14357
Dij14	Pr	N1	C3	Bn-C3-p59307101	162.96	55713088	C	T	0.3088	139.061	172.561	4.80703e+07	5.75712e+07	0.35	C	1.20681
Dij14	Pr	N1	C3	Bn-C3-p63524761	184.96	59331638	T	C	0.2464	176.861	189.861	5.80577e+07	6.02029e+07	0.11	C	0.752837
Dij14	Pr	N1	C4	Bn-C3-p57435791	60.04	23169244	C	T	0.3478	60.04	97.89	2.28556e+07	4.29677e+07	0.28	C	0.999407
Dij14	Pr	N1	C4	Bn-C4-p51020311	122.34	46169247	A	C	0.1594	121.84	122.56	4.60043e+07	4.63342e+07	0.09	C	0.790228
Dij14	Pr	N1	C5	Bn-C5-p1083316	8.01	1032355	A	T	0.05882	5.01	8.41	949938	1.11477e+06	0.11	T	1.2362
Dij14	Pr	N1	C5	Bn-C5-p8459472	50.11	7834764	T	C	0.0882	49.31	50.83	7.40601e+06	8.26352e+06	0.11	T	1.05841
Dij14	Pr	N1	C5	Bn-A05-p17895197	68.45	33068692	C	G	0.1449	68.45	68.45	3.305e+07	3.30861e+07	0.19	G	1.05671
Dij14	Pr	N1	C6	Bn-A03-p23607037	2.38	1367580	G	T	0.1159	2.38	5.08	1.15036e+06	1.5848e+06	0.09	G	0.862884
Dij14	Pr	N1	C6	Bn-C6-p2132472	90.48	35006174	C	A	0.2174	87.48	94.98	3.46779e+07	3.53344e+07	0.09	A	0.721383
Dij14	Pr	N1	C7	Bn-C7-p43385270	77.1	40104047	C	T	0.1176	76.2	79.58	3.99359e+07	4.04641e+07	0.14	C	1.16222
Dij14	Pr	N1	C7	Bn-C7-p45273083	86.6	41821480	T	C	0.0579	84.8	86.9	4.15385e+07	4.19627e+07	0.22	C	1.67728
Dij14	Pr	N1	C8	Bn-A08-p6162660	5.8	14268480	G	A	0.4783	4	31.8	687169	2.13759e+07	0.1	A	0.618152
Dij14	Pr	N1	C8	Bn-C8-p38447645	89.2	35905726	C	A	0.2576	89.2	100.77	3.57919e+07	3.72694e+07	0.12	C	0.756796
Dij14	Pr	N1	C9	Bn-C3-p56764646	59.3	20517280	G	A	0.3478	59.3	59.3	2.04117e+07	2.06232e+07	0.25	G	0.945964
Dij14	Pr	N1	C9	Bn-C3-p22573589	63.43	33855513	A	G	0.1159	55.5	63.43	3.1196e+07	3.6515e+07	0.09	G	0.866021
Dij14	Pr	N2	A2	Bn-A02-p3860483	21.9	1279875	G	T	0.1061	16.7	21.9	993476	1.5652e+06	0.3	T	0.578101
Dij14	Pr	N2	A5	Bn-A05-p17241091	53.13	14207054	T	G	0.0725	52.13	53.13	1.36233e+07	1.48042e+07	0.27	G	0.667273
Dij14	Pr	N2	A9	Bn-A09-p25236454	76.19	23259026	A	G	0.0579	74.92	76.19	2.30017e+07	2.36212e+07	0.25	G	0.706646
Dij14	Pr	N2	A10	Bn-A10-p7078767	9.2	8667939	T	C	0.1159	5.7	9.2	8.48877e+06	8.84711e+06	0.25	C	0.510547
Dij14	Pr	N2	C3	Bn-C3-p30529798	115.26	28566199	T	C	0.0725	114.66	131.46	2.8164e+07	4.73185e+07	0.27	C	0.653605
Dij14	Pr	N2	C7	Bn-C7-p45273083	86.6	41821480	T	C	0.0579	86.4	88.4	4.17592e+07	4.18837e+07	0.26	C	0.700625
Dij14	Pr	N2	C9	Bn-C9-p45919715	76.1	41442589	A	G	0.2239	75.8	76.1	4.11898e+07	4.16953e+07	0.25	G	0.440957
Pre14	O	N1	A9	Bn-A01-p9125819	15.89	2472865	T	G	0.4853	15.59	50.44	2.29649e+06	6.06794e+06	0.23	G	0.89518
Pre14	O	N1	C2	Bn-C2-p51343986	134	44930141	A	G	0.4697	125.9	144.38	4.43097e+07	4.58981e+07	0.29	A	1.06545
Pre14	O	N1	C9	Bn-C9-p4989649	29.1	3592250	T	C	0.4127	29.1	29.1	3.40417e+06	3.78033e+06	0.23	T	0.96328
Pre14	O	N2	A9	Bn-A09-p3029767	20.29	2949785	T	C	0.4615	13.69	22.59	1.6093e+06	3.40717e+06	0.27	T	0.924513
Pre14	O	N2	C1	Bn-C1-p5195180	32.7	5031632	C	T	0.3088	32.7	32.7	4.82857e+06	5.23931e+06	0.23	T	0.860373
Pre14	O	N2	C2	Bn-C2-p51343986	134	44930141	A	G	0.4697	125.39	141.95	4.47732e+07	4.50871e+07	0.28	A	1.00143
Pre14	O	N2	C9	Bn-C9-p4989649	29.1	3592250	T	C	0.4127	29.1	29.1	3.40417e+06	3.78033e+06	0.26	T	0.98876
Pre14	O/Pr	N1	A9	Bn-A09-p3024539	19.99	2944505	T	C	0.4923	15.59	35.49	2.14273e+06	4.09933e+06	0.23	T	0.142175
Pre14	O/Pr	N1	C2	Bn-C2-p51343986	134	44930141	A	G	0.4697	125.9	144.38	4.43112e+07	46139626	0.29	A	0.172056
Pre14	O/Pr	N1	C9	Bn-C9-p4989649	29.1	3592250	T	C	0.4127	29.1	29.1	3.40417e+06	3.78033e+06	0.23	T	0.15547
Pre14	O/Pr	N2	A9	Bn-A09-p3024539	19.99	2944505	T	C	0.4923	15.59	35.19	2.14245e+06	4.04944e+06	0.28	T	0.115981
Pre14	O/Pr	N2	C2	Bn-C2-p51343986	134	44930141	A	G	0.4697	125.39	141.95	4.47732e+07	4.50871e+07	0.27	A	0.124598
Pre14	O/Pr	N2	C9	Bn-C9-p4989649	29.1	3592250	T	C	0.4127	29.1	29.1	3.40417e+06	3.78033e+06	0.25	T	0.120979
Pre14	Pr	N1	A9	Bn-A09-p4291965	28.39	3769203	C	T	0.3881	17.49	35.19	2.59159e+06	4.05029e+06	0.22	T	0.691056
Pre14	Pr	N1	C2	Bn-C2-p51343986	134	44930141	A	G	0.4697	125.9	144.38	4.43112e+07	46139626	0.25	G	0.894475
Pre14	Pr	N1	C9	Bn-C9-p4989649	29.1	3592250	T	C	0.4127	29.1	29.1	3.40417e+06	3.78033e+06	0.2	C	0.802176
Pre14	Pr	N2	A9	Bn-A09-p3024539	19.99	2944505	T	C	0.4923	15.59	22.59	2.11416e+06	3.41056e+06	0.25	C	0.732437
Pre14	Pr	N2	C2	Bn-C2-p51343986	134	44930141	A	G	0.4697	125.39	141.95	4.47732e+07	4.50871e+07	0.24	G	0.781794
Pre14	Pr	N2	C9	Bn-C9-p4989649	29.1	3592250	T	C	0.4127	29.1	29.1	3.40417e+06	3.78033e+06	0.22	C	0.763696
Pre14	SY	N1	A4	Bn-A04-p11512379	22.1	12568660	T	C	0.1045	21.85	22.5	1.24044e+07	1.27267e+07	0.33	T	1.94088
Pre14	SY	N1	A5	Bn-A05-p6897871	48.83	6348806	A	G	0.0725	48.13	52.73	6.20058e+06	6.49703e+06	0.27	A	2.08436
Pre14	TSW	N2	A1	Bn-A01-p2448162	15.4	1938900	T	A	0.0588	15.4	15.4	1880157	1997643	0.11	T	0.299745
Pre14	TSW	N2	A2	Bn-A02-p4151292	21.9	1532662	T	C	0.0588	16.7	27.75	1.16315e+06	1.86164e+06	0.14	T	0.346032
Pre14	TSW	N2	A2	Bn-A02-p20062461	75.2	20138470	C	T	0.1449	70.94	75.2	1.99933e+07	2.02837e+07	0.13	C	0.224327
Pre14	TSW	N2	A3	Bn-A03-p2668128	19.09	2220556	T	C	0.1111	4.89	21.29	601058	2.40539e+06	0.12	T	0.235537
Pre14	TSW	N2	A3	Bn-C3-p23473421	85.69	14622515	C	T	0.0579	64.59	85.69	9.75241e+06	1.47158e+07	0.17	T	0.383338
Pre14	TSW	N2	A3	Bn-A03-p16229294	91.39	15317896	C	T	0.0735	89.89	136.69	1.51727e+07	2.85333e+07	0.17	T	0.338858
Pre14	TSW	N2	A4	Bn-A04-p17816796	62.79	17923025	G	A	0.2319	60.8	64.3	1.77777e+07	1.83944e+07	0.15	G	0.203815
Pre14	TSW	N2	A5	Bn-Scaffold000403-p12697	1.23	461528	A	C	0.2319	1.23	1.83	359061	563995	0.24	A	0.252997
Pre14	TSW	N2	A5	Bn-A05-p20232989	61.63	18446009	T	C	0.0869	61.63	65.53	1.83496e+07	1.85424e+07	0.12	T	0.27438
Pre14	TSW	N2	A6	Bn-A06-p22605217	102.51	21643954	A	G	0.4928	90.11	105.308	2.00678e+07	2.16994e+07	0.14	A	0.155063
Pre14	TSW	N2	A6	Bn-A06-p24170361	117.31	23158490	A	G	0.1014	114.91	117.91	2.30642e+07	2.32499e+07	0.14	A	0.268989
Pre14	TSW	N2	A7	Bn-A07-p4191541	6.83	6111358	T	C	0.1884	3.55	7.6	2.65481e+06	7.6842e+06	0.15	T	0.213849
Pre14	TSW	N2	A7	Bn-A02-p873770	32.65	13504928	T	C	0.1304	32.35	34.35	1.33878e+07	1.3622e+07	0.13	C	0.23365
Pre14	TSW	N2	A7	Bn-A07-p14824091	55.55	16697242	T	C	0.1159	55.55	55.55	1.65593e+07	1.68719e+07	0.11	C	0.224896
Pre14	TSW	N2	A7	Bn-A07-p16793852	64.65	18723693	A	G	0.1159	64.65	67.15	1.86138e+07	1.88336e+07	0.13	A	0.24672
Pre14	TSW	N2	A7	Bn-C6-p1629681	89.45	22742238	A	G	0.4348	89.45	89.75	2.26427e+07	2.28535e+07	0.12	A	0.151808
Pre14	TSW	N2	A8	Bn-C3-p24233954	3.57	4824680	C	A	0.3188	2.67	4.97	2.57646e+06	7.0729e+06	0.12	A	0.162667
Pre14	TSW	N2	A9	Bn-A09-p35797678	123.09	32939416	A	C	0.0725	119.99	126.29	3.23138e+07	3.31627e+07	0.16	A	0.336813
Pre14	TSW	N2	A10	Bn-A10-p4621384	7.7	250150	G	T	0.0735	7.7	7.7	129180	371120	0.11	T	0.276695
Pre14	TSW	N2	A10	Bn-A10-p9118672	13.8	10516268	A	C	0.0725	13.5	44.6	1.0433e+07	1.44939e+07	0.14	A	0.317818
Pre14	TSW	N2	A10	Bn-A10-p16737974	67.5	16535774	C	T	0.0746	64.8	68.1	1.59396e+07	1.66374e+07	0.19	T	0.358789
Pre14	TSW	N2	C1	Bn-C1-p3804776	28.64	3460393	T	C	0.0725	26.19	29.84	3.13023e+06	3.78777e+06	0.13	T	0.303336
Pre14	TSW	N2	C1	Bn-C1-p11646566	49.84	11203690	A	G	0.1765	31.3	52.14	4.36323e+06	1.18165e+07	0.13	A	0.21097
Pre14	TSW	N2	C1	Bn-C1-p34387623	73.84	32424061	C	A	0.3333	69.64	75.04	3.18303e+07	3.30345e+07	0.11	C	0.153894
Pre14	TSW	N2	C1	Bn-A01-p24858036	88.44	36526858	G	A	0.2941	84.94	88.74	3.63707e+07	3.72213e+07	0.2	A	0.215602
Pre14	TSW	N2	C2	Bn-C2-p781626	0.18	1346299	C	T	0.1343	0.18	0.4	1.25762e+06	1.43498e+06	0.13	C	0.235296
Pre14	TSW	N2	C2	Bn-C2-p24452796	64.8	21426248	G	A	0.4348	61.9	67.9	1.91553e+07	2.36972e+07	0.11	G	0.145208
Pre14	TSW	N2	C2	Bn-C2-p50704549	131.5	44839603	C	G	0.1304	125.9	143.16	4.41178e+07	4.55614e+07	0.11	C	0.215437
Pre14	TSW	N2	C3	Bn-C3-p6576558	42.56	6208970	T	C	0.1912	36.99	49.76	5.46921e+06	6.97484e+06	0.11	T	0.183527
Pre14	TSW	N2	C3	Bn-C3-p21482716	85.46	19662101	A	G	0.3478	84.46	87.61	1.94018e+07	1.99224e+07	0.14	G	0.174802
Pre14	TSW	N2	C3	Bn-C3-p60690631	168.31	56921246	T	G	0.3636	163.86	172.561	5.63649e+07	5.7913e+07	0.11	G	0.156534
Pre14	TSW	N2	C5	Bn-C5-p1917307	13.01	1733256	G	A	0.3971	5.01	14.81	951466	1.83477e+06	0.16	A	0.177586
Pre14	TSW	N2	C5	Bn-C5-p4837700	42.04	4661080	A	G	0.3913	36	42.04	4.27728e+06	5.28369e+06	0.16	G	0.177142
Pre14	TSW	N2	C5	Bn-C5-p17124560	58.01	14914402	T	G	0.0869	58.01	60.71	1.40342e+07	1.57946e+07	0.13	G	0.28518
Pre14	TSW	N2	C6	Bn-A07-p17404116	69.08	29466129	C	T	0.0735	62.88	76.28	2.56439e+07	3.32884e+07	0.17	T	0.337178
Pre14	TSW	N2	C6	Bn-C6-p2132472	90.48	35006174	C	A	0.2174	87.48	94.98	3.46779e+07	3.53344e+07	0.12	A	0.182061
Pre14	TSW	N2	C7	Bn-C7-p40462785	68.63	37136977	G	A	0.2464	64.88	74.7	3.68432e+07	3.86583e+07	0.16	A	0.202339
Pre14	TSW	N2	C7	Bn-C7-p45273083	86.6	41821480	T	C	0.0579	84.8	86.9	4.16866e+07	4.20026e+07	0.16	C	0.377397
Pre14	TSW	N2	C8	Bn-C8-p2003438	2.6	1939958	A	G	0.1449	1.5	2.6	1.50393e+06	2.4569e+06	0.12	A	0.211231
Pre14	TSW	N2	C8	Bn-C3-p30510122	5.56	15788316	G	A	0.1159	5.56	40	1.12757e+07	2.48993e+07	0.13	A	0.243885
Pre14	TSW	N2	C9	Bn-C4-p20209726	63.42	33349385	A	G	0.1159	63.42	66.72	3.04178e+07	3.6281e+07	0.11	A	0.226587
Sel14	SN	N1	A3	Bn-A03-p708787	3.69	573276	T	C	0.303	1.09	5.79	403759	802785	0.28	T	9921.23
Sel14	SY	N1	A4	Bn-A04-p13705636	40	14344609	A	G	0.3676	40	40	1.37621e+07	1.45849e+07	0.24	A	4.15671
Sel14	SY	N1	A5	Bn-A05-p20461727	67.23	18662780	C	T	0.2754	66.32	67.23	1.85896e+07	1.8742e+07	0.2	C	3.7775
Sel14	SY	N1	A8	Bn-A08-p21070052	69.17	18649173	G	A	0.2353	69.17	69.17	1.85909e+07	1.87074e+07	0.2	G	4.18308
Sel14	SY	N1	A9	Bn-A01-p9080359	15.89	2507380	C	A	0.4706	15.89	17.79	2.39315e+06	2.62161e+06	0.2	C	3.99706
Sel14	SY	N1	C6	Bn-C6-p25760192	34.07	12752928	A	G	0.0579	24.38	35.58	1.22518e+07	1.30392e+07	0.2	A	6.77332
Sel14	SY	N1	C6	Bn-C6-p12910270	61.18	24497200	A	C	0.1912	59.88	61.18	2.41517e+07	2.48427e+07	0.21	A	4.31252
Sel14	SY	N1	C7	Bn-C7-p37815425	57.5	34913509	C	T	0.4058	57.5	60.8	3.47323e+07	3.52707e+07	0.25	T	4.07641
Sel14	SY	N1	C8	Bn-A09-p34591600	93.1	36034772	G	A	0.4348	89.2	94.3	3.59171e+07	3.61524e+07	0.22	G	3.5038
Sel14	SY	N2	A1	Bn-A01-p1145674	3.94	749040	C	T	0.2687	2.5	3.94	680417	817663	0.11	T	2.53511
Sel14	SY	N2	A1	Bn-A01-p3111607	22.7	2814344	T	G	0.0895	22.7	23.9	2.7556e+06	2.87309e+06	0.14	T	4.39107
Sel14	SY	N2	A1	Bn-A01-p5242967	34.5	4826061	C	T	0.2985	33.7	34.9	4.74001e+06	4.91233e+06	0.12	C	2.67719
Sel14	SY	N2	A1	Bn-A01-p5469727	35.2	5034408	T	C	0.3433	34.9	36.4	4.95571e+06	5.1131e+06	0.11	C	2.57128
Sel14	SY	N2	A3	Bn-A03-p2262214	15.19	1831978	G	A	0.0597	1.09	21.29	160382	2.31098e+06	0.22	G	7.03291
Sel14	SY	N2	A3	Bn-A03-p10802728	64.59	9973043	T	C	0.2464	64.59	64.79	9.87864e+06	1.00618e+07	0.16	T	3.54072
Sel14	SY	N2	A3	Bn-C3-p27995433	101.89	17118420	A	C	0.1884	101.59	104.19	1.69173e+07	1.73195e+07	0.11	A	3.53009
Sel14	SY	N2	A3	Bn-A03-p20550791	111.59	19385432	T	C	0.1818	111.29	113.19	1.92725e+07	1.94984e+07	0.12	T	3.10319
Sel14	SY	N2	A3	Bn-A03-p25608893	132.89	23974063	T	G	0.1176	130.99	133.19	2.38618e+07	2.40863e+07	0.12	T	3.62627
Sel14	SY	N2	A4	Bn-A04-p6968899	9.8	8255363	A	G	0.1304	7.73	10.9	5.44923e+06	9.36801e+06	0.22	A	5.06077
Sel14	SY	N2	A4	Bn-A04-p11513352	22.1	12569734	G	A	0.07463	20.8	46.1	1.22799e+07	1.56444e+07	0.17	G	5.63505
Sel14	SY	N2	A5	Bn-A05-p800515	5.03	927094	A	C	0.2754	2.43	5.73	817093	1.03709e+06	0.14	C	4.21679
Sel14	SY	N2	A5	Bn-A05-p3248878	27.03	3277804	A	G	0.4559	24.26	27.33	3.18654e+06	3.36907e+06	0.12	G	2.70503
Sel14	SY	N2	A5	Bn-A05-p5770114	44.63	5501463	T	G	0.1045	28.13	49.13	3.57427e+06	6.66461e+06	0.21	T	5.23867
Sel14	SY	N2	A5	Bn-A05-p18101769	56.43	16381082	C	T	0.4058	54.63	56.43	1.61721e+07	1.66306e+07	0.15	T	2.68514
Sel14	SY	N2	A5	Bn-A05-p20461727	67.23	18662780	C	T	0.2754	66.32	67.23	1.85896e+07	1.8742e+07	0.11	C	2.70554
Sel14	SY	N2	A5	Bn-A05-p20972649	71.53	19111467	C	T	0.0579	71.53	74.53	1.90486e+07	1.92292e+07	0.13	C	5.71144
Sel14	SY	N2	A5	Bn-A02-p26854880	103.23	22381796	C	T	0.4928	100.13	105.83	2.12906e+07	23023824	0.14	T	2.95005
Sel14	SY	N2	A6	Bn-A06-p16283909	74.71	17810306	T	C	0.0869	74.71	76.04	1.77065e+07	1.79148e+07	0.11	T	4.23873
Sel14	SY	N2	A7	Bn-A07-p2524777	5.05	4510606	G	T	0.3623	3.25	5.05	3.80184e+06	5.21937e+06	0.11	G	2.63585
Sel14	SY	N2	A7	Bn-A07-p11330018	27.95	12682351	T	G	0.1884	27.95	28.25	1.25525e+07	1.28122e+07	0.19	T	4.14019
Sel14	SY	N2	A8	Bn-A08-p13995190	17.97	11721976	A	G	0.3623	17.37	21.17	1.16138e+07	1.26243e+07	0.12	A	2.50665
Sel14	SY	N2	A8	Bn-A08-p16125811	28.17	13582310	G	T	0.0579	26.82	30.17	1.33972e+07	1.37675e+07	0.15	G	5.39503
Sel14	SY	N2	A8	Bn-A08-p21070052	69.17	18649173	G	A	0.2353	69.17	70.61	1.84333e+07	1.88651e+07	0.23	G	4.30446
Sel14	SY	N2	A9	Bn-A09-p2733282	17.79	2677515	A	G	0.4848	8.36	40.89	1.02822e+06	4.77427e+06	0.19	A	3.82412
Sel14	SY	N2	A9	Bn-A09-p20081587	66.99	17057485	A	G	0.0597	65.49	67.59	1.55708e+07	1.85442e+07	0.14	A	5.39074
Sel14	SY	N2	A10	Bn-A10-p9352439	9.7	10787502	G	A	0.0725	9.7	48.6	9.603e+06	1.48043e+07	0.15	G	5.13277
Sel14	SY	N2	C1	Bn-C1-p18212417	65.24	17137838	C	T	0.1304	43.3423	71.5423	9.16729e+06	3.09744e+07	0.18	C	4.3757
Sel14	SY	N2	C3	Bn-C3-p5212331	34.66	5007377	C	T	0.1304	26.47	40.5	4.14728e+06	5.86748e+06	0.14	C	4.11776
Sel14	SY	N2	C3	Bn-A01-p27119250	103.16	22434488	C	T	0.2206	99.96	104.33	2.19477e+07	2.26093e+07	0.13	C	3.33966
Sel14	SY	N2	C3	Bn-C3-p28615718	113.76	26335137	T	C	0.1791	111.66	119.56	2.41246e+07	3.06426e+07	0.22	T	4.43607
Sel14	SY	N2	C4	Bn-A05-p4036806	34.34	6028472	T	G	0.3043	32.34	36.14	5.74126e+06	6.31568e+06	0.14	T	3.02481
Sel14	SY	N2	C4	Bn-A05-p4736340	40.24	7096462	G	T	0.0579	38.94	40.24	6.73618e+06	7.45674e+06	0.11	G	5.08007
Sel14	SY	N2	C4	Bn-C4-p15358035	51.74	14028466	T	G	0.0725	47.84	53.54	8.62308e+06	1.45347e+07	0.18	T	5.70708
Sel14	SY	N2	C4	Bn-Scaffold09888-p365	88.77	38800466	G	T	0.1642	87.84	90.63	3.82234e+07	3.9963e+07	0.14	G	3.44873
Sel14	SY	N2	C5	Bn-C5-p14702534	58.01	14356982	T	G	0.3333	58.01	58.01	1.39682e+07	1.47458e+07	0.14	T	3.0902
Sel14	SY	N2	C5	Bn-C5-p45854218	117.01	42566107	A	G	0.2899	117.01	118.51	4.24511e+07	4.26811e+07	0.13	A	2.73617
Sel14	SY	N2	C6	Bn-C6-p25754041	34.07	12756504	C	A	0.0579	24.38	35.58	1.22518e+07	1.30392e+07	0.21	C	6.65761
Sel14	SY	N2	C6	Bn-C6-p12910270	61.18	24497200	A	C	0.1912	47.08	62.88	1.98303e+07	2.49354e+07	0.15	A	3.46463
Sel14	SY	N2	C6	Bn-C6-p1034418	100.88	36178610	G	A	0.1515	100.88	100.88	3.60211e+07	3.63317e+07	0.13	G	3.65673
Sel14	SY	N2	C7	Bn-C7-p29946140	38.16	27710534	C	A	0.1429	34.88	38.16	2.74438e+07	2.80436e+07	0.13	C	3.77458
Sel14	SY	N2	C7	Bn-C7-p35566891	51	32902306	G	T	0.2174	44.4	55.1	3.14602e+07	3.4116e+07	0.2	T	4.30174
Sel14	SY	N2	C7	Bn-C7-p37740616	57.8	34843632	G	A	0.2174	40.7	60.25	3.44108e+07	3.57965e+07	0.21	A	4.62871
Sel14	SY	N2	C8	Bn-C8-p1650985	1.8	1693058	G	T	0.0869	1.5	77	1.43822e+06	3.32196e+07	0.17	G	5.05771
Sel14	SY	N2	C8	Bn-A09-p34591600	93.1	36034772	G	A	0.4348	89.2	94.3	3.59171e+07	3.62281e+07	0.16	G	2.89842
Sel14	SY	N2	C9	Bn-C9-p4989649	29.1	3592250	T	C	0.4127	16.3	55.5	566948	3.8423e+06	0.18	T	3.84817
Ver14	O/Pr	N1	C2	Bn-C2-p52733615	53.2	12308084	G	T	0.3385	46.9	54.7	1.1781e+07	1.28154e+07	0.28	G	0.206327
Ver14	O/Pr	N1	C2	Bn-Scaffold00615-p54472	144.38	45862269	A	G	0.3846	141.94	144.38	4.52126e+07	46139626	0.28	G	0.223054
Ver14	Pr	N1	A1	Bn-A01-p20393111	65	17192792	G	A	0.0735	62.9	65	1.67042e+07	1.74457e+07	0.21	A	1.07694
Ver14	Pr	N1	A1	Bn-A01-p20990218	65.3	17795523	C	T	0.197	65	65.3	1.76103e+07	1.79807e+07	0.2	T	0.731071
Ver14	Pr	N1	A9	Bn-A09-p4291965	28.39	3769203	C	T	0.3881	17.49	35.19	2.59159e+06	4.05029e+06	0.22	T	0.621129
Ver14	Pr	N1	C2	Bn-C2-p52710286	53.2	12286932	G	A	0.3385	46.9	54.7	1.1781e+07	1.28154e+07	0.31	A	0.758974
Ver14	Pr	N1	C2	Bn-C2-p52207948	143.16	45586626	A	G	0.4394	125.9	144.38	4.43534e+07	46139626	0.1	A	0.601323
Ver14	Pr	N1	C9	Bn-C9-p45919715	76.1	41442589	A	G	0.2239	75.5	76.1	4.11565e+07	4.17535e+07	0.25	G	0.78377
Ver14	SN	N1	A4	Bn-A04-p11513352	22.1	12569734	G	A	0.0746	21.85	22.5	1.24044e+07	1.27277e+07	0.29	G	8676.76
Ver14	SY	N1	A3	Bn-A03-p10873434	64.79	28367437	C	A	0.1045	64.59	65.39	9.75241e+06	9922431	0.21	C	3.4842
Ver14	SY	N1	A4	Bn-C4-p43176727	22.1	12562400	T	C	0.1029	21.85	22.5	1.24044e+07	1.27277e+07	0.26	T	2.73604
Ver14	SY	N1	A5	Bn-A05-p6897871	48.83	6348806	A	G	0.0725	48.13	52.73	6.20058e+06	6.49703e+06	0.22	A	3.1608
Ver14	SY	N1	A10	Bn-A10-p9186877	13.8	9694202	A	G	0.0869	9.7	15.6	9.603e+06	1.09967e+07	0.2	A	3.3794
Ver14	SY	N1	C3	Bn-C3-p51012844	134.86	46916274	A	G	0.0725	131.46	134.86	4.64629e+07	4.73697e+07	0.19	A	2.76786
Ver14	SY	N2	A1	Bn-A01-p1000115	3	617658	A	T	0.1667	2.52	3.63	433258	685037	0.17	T	3.35436
Ver14	SY	N2	A1	Bn-A01-p5480517	36.4	5042549	C	T	0.4242	27.2	36.4	3.77411e+06	5.15419e+06	0.15	C	2.4153
Ver14	SY	N2	A1	Bn-A01-p23020726	68.3	19513123	G	A	0.1343	65	70.4	1.76274e+07	1.96812e+07	0.14	G	3.06631
Ver14	SY	N2	A1	Bn-A01-p24697185	74.6	20465114	G	T	0.3906	74.6	76.7	2.03727e+07	2.05575e+07	0.13	G	2.45439
Ver14	SY	N2	A3	Bn-A03-p708787	3.69	573276	T	C	0.303	1.09	5.79	403759	802785	0.12	T	2.64322
Ver14	SY	N2	A3	Bn-A03-p10758970	64.59	9919731	A	G	0.1324	64.59	64.79	9.8783e+06	1.00841e+07	0.18	A	3.84058
Ver14	SY	N2	A3	Bn-A03-p11156293	65.99	10261369	C	T	0.07246	65.69	68.29	1.01547e+07	1.0368e+07	0.13	C	3.98109
Ver14	SY	N2	A3	Bn-A03-p18592597	104.49	17606621	A	C	0.1014	104.19	105.09	1.73939e+07	1.7791e+07	0.18	A	4.16764
Ver14	SY	N2	A4	Bn-A04-p6968899	9.8	8255363	A	G	0.1304	8.72	10.06	8.05951e+06	8.46184e+06	0.14	A	3.29179
Ver14	SY	N2	A4	Bn-A04-p11510797	22.1	12567132	A	G	0.1014	21.85	22.5	1.24044e+07	1.27277e+07	0.28	A	5.30689
Ver14	SY	N2	A4	Bn-A04-p14483727	41.2	14933123	G	A	0.1594	39.85	41.8	1.48098e+07	1.50541e+07	0.14	G	3.37048
Ver14	SY	N2	A5	Bn-A05-p4068277	32.13	3929112	T	C	0.3582	28.13	34.13	3.62614e+06	4.29088e+06	0.13	T	2.37534
Ver14	SY	N2	A5	Bn-A05-p6897871	48.83	6348806	A	G	0.0725	42.03	49.13	5.13272e+06	6.71755e+06	0.23	A	5.60788
Ver14	SY	N2	A5	Bn-A05-p18135244	56.43	16421585	G	A	0.3881	54.63	56.43	1.62111e+07	1.66321e+07	0.11	A	1.93883
Ver14	SY	N2	A5	Bn-A05-p22351135	92.7	20415711	C	T	0.0909	90.83	92.7	2.02923e+07	2.05391e+07	0.14	C	3.59838
Ver14	SY	N2	A5	Bn-A02-p23095572	100.36	21629496	T	G	0.2029	94.21	105.83	2.08545e+07	23023824	0.18	G	3.39765
Ver14	SY	N2	A7	Bn-A07-p607926	2.35	503142	T	C	0.1884	2.35	2.35	421175	645808	0.15	T	3.28686
Ver14	SY	N2	A7	Bn-A10-p12366655	7.6	3051073	C	T	0.3913	2.95	7.6	657863	4.72578e+06	0.14	C	2.23869
Ver14	SY	N2	A7	Bn-A07-p13693377	49.1	15689000	G	A	0.2319	46.15	49.1	1.56037e+07	1.57743e+07	0.14	A	2.87661
Ver14	SY	N2	A7	Bn-A07-p19409951	78.65	21200527	A	G	0.3623	78.65	79.58	2.11078e+07	2.12933e+07	0.14	G	2.19863
Ver14	SY	N2	A7	Bn-A07-p20144687	83.25	21915545	G	A	0.4328	82.35	83.35	2.18171e+07	2.20055e+07	0.12	G	2.31514
Ver14	SY	N2	A8	Bn-A08-p14156050	17.97	11851743	A	C	0.4203	17.97	20.27	1.16563e+07	1.20472e+07	0.13	C	2.44367
Ver14	SY	N2	A8	Bn-A08-p16125811	28.17	13582310	G	T	0.0579	26.82	30.17	1.33972e+07	1.37675e+07	0.16	G	4.55797
Ver14	SY	N2	A8	Bn-A08-p21070052	69.17	18649173	G	A	0.2353	69.17	70.61	1.84333e+07	1.88651e+07	0.14	G	2.80911
Ver14	SY	N2	A9	Bn-A09-p3047090	20.29	2966543	T	C	0.4478	1.09	53.29	255496	6.59831e+06	0.22	T	3.22615
Ver14	SY	N2	A9	Bn-A08-p9146867	65.49	14222248	T	C	0.0869	64.97	67.59	1.26868e+07	1.85929e+07	0.13	T	3.6471
Ver14	SY	N2	A10	Bn-A10-p9052583	13.5	10444212	A	G	0.1014	9.7	49.7	9.603e+06	1.49771e+07	0.2	A	4.41779
Ver14	SY	N2	C1	Bn-C1-p4327378	29.84	3995548	C	T	0.3971	27.23	31.3	3.3053e+06	4.31909e+06	0.14	C	2.56927
Ver14	SY	N2	C1	Bn-C1-p37170472	77.44	34962509	G	A	0.1618	77.44	77.44	3.43909e+07	3.55607e+07	0.12	A	2.70966
Ver14	SY	N2	C2	Bn-C2-p52710286	53.2	12286932	G	A	0.3385	46.6	54.7	1.1295e+07	1.33014e+07	0.13	G	2.34968
Ver14	SY	N2	C2	Bn-C2-p51343986	134	44930141	A	G	0.4697	100.9	144.38	4.12677e+07	46139626	0.17	A	3.15461
Ver14	SY	N2	C3	Bn-A01-p27119250	103.16	22434488	C	T	0.2206	102.86	104.33	2.22597e+07	2.26093e+07	0.11	C	2.5682
Ver14	SY	N2	C3	Bn-C3-p51012844	134.86	46916274	A	G	0.0725	131.46	134.86	4.64629e+07	4.73697e+07	0.12	A	4.12747
Ver14	SY	N2	C4	Bn-C4-p37792493	79.44	34439310	A	C	0.0746	78.14	83.24	3.38375e+07	3.50416e+07	0.14	A	3.77921
Ver14	SY	N2	C4	Bn-Scaffold09888-p365	88.77	38800466	G	T	0.1642	87.84	90.63	3.82234e+07	3.9963e+07	0.13	G	2.79432
Ver14	SY	N2	C6	Bn-C6-p19250883	42.88	19029424	A	C	0.1014	38.88	47.08	1.83869e+07	1.95889e+07	0.17	A	3.9535
Ver14	SY	N2	C6	Bn-C6-p1034418	100.88	36178610	G	A	0.1515	71.68	100.88	3.24452e+07	3.64606e+07	0.14	G	3.19975
Ver14	SY	N2	C7	Bn-C7-p36749441	53.6	33959826	G	A	0.2029	53.6	55.1	3.38326e+07	3.4116e+07	0.15	A	3.33255
Ver14	SY	N2	C7	Bn-C7-p37815425	57.5	34913509	C	T	0.4058	56.57	60.25	3.46833e+07	3.57965e+07	0.2	T	2.9231
Ver14	SY	N2	C8	Bn-C8-p21614432	31.8	20898335	T	G	0.2754	26.2	32.6	2.04554e+07	2.11707e+07	0.19	G	3.06316
Ver14	SY	N2	C8	Bn-C8-p38644042	91.6	36108163	G	A	0.4394	89.2	94.3	3.59905e+07	3.62281e+07	0.11	G	2.05571
Ver14	SY	N2	C9	Bn-C9-p4989649	29.1	3592250	T	C	0.4127	16.3	55.5	566948	3.8423e+06	0.17	T	3.15734
Ver14	SY	N2	C9	Bn-C9-p20705292	59.9	17310090	C	T	0.3623	59.9	66.7	1.6972e+07	1.79052e+07	0.11	T	2.36581
Ver14	SY	N2	C9	Bn-C9-p38373521	64.93	35037987	T	C	0.3623	64.93	66.72	3.43772e+07	3.57452e+07	0.14	C	2.47334
Ver14	SY	N2	C9	Bn-C9-p45977174	76.1	41500704	A	G	0.2206	75.5	76.1	4.11565e+07	4.17535e+07	0.16	A	2.9195
